# Supplementary material
Source: PubMed Central journal article supplement (PMC7812606)
Supplement: ml0c00533_si_001.pdf [file ml0c00533_si_001.pdf]

## Supporting Information

# Thiophene-Pyrazolourea Derivatives as Potent, Orally Bioavailable, and Isoform-Selective JNK3 Inhibitors

Yangbo Feng<sup>1,\*</sup>, HaJeung Park<sup>2</sup>, Luke Bauer<sup>3</sup>, Jae Cheon Ryu<sup>3</sup>, Sung OK Yoon<sup>3,\*</sup>

<sup>1</sup>Reaction Biology Corporation, One Great Valley Parkway, Malvern, PA 19355; <sup>2</sup>Crystallography Core Facility, Scripps Florida, TSRI, 130 Scripps Way, Jupiter, FL 33458; <sup>3</sup>Department of Biological Chemistry & Pharmacology, Ohio State University College of Medicine, Columbus, OH 43210.

\*To whom corresponding should be addressed: yangbof@gmail.com; sung.yoon@osumc.edu.

### 1. Experimental Section

Commercially available reagents and anhydrous solvents were used without further purification unless otherwise specified. Thin layer chromatography (TLC) analyses were performed with precoated silica gel 60 F254. The mass spectra were recorded by LC/MS with Finnigan LCQ Advantage MAX spectrometer of Thermo Electron®. Flash chromatography was performed on prepacked columns of silica gel (230-400 Mesh, 40-63  $\mu\text{m}$ ) by CombiFlash® with EtOAc/hexane or MeOH/DCM as eluents. The preparative HPLC was performed on SunFire C<sub>18</sub> OBD 10  $\mu\text{m}$  (30 x 250 mm) with CH<sub>3</sub>CN + 50% MeOH / H<sub>2</sub>O + 0.1% TFA as eluents to purify the targeted compounds. Analytic HPLC was performed on agilent technologies 1200 series with CH<sub>3</sub>CN (Solvent B) / H<sub>2</sub>O + 0.9% CH<sub>3</sub>CN + 0.1% TFA (Solvent A) as eluents and the targeted products were detected by UV in the detection range of 215-310 nm. All compounds were determined to be > 95% pure by this method. NMR spectra were recorded with a Bruker® 400 MHz spectrometer at ambient temperature with the residual solvent peaks as internal standards. The line positions of multiplets were given in ppm ( $\delta$ ) and the coupling constants ( $J$ ) were given in Hertz. Calibration was performed with an external calibration mixture immediately prior to analysis.

#### 1.1 General synthetic procedures:

The synthetic route for preparing inhibitors **3-28** is shown in Scheme 1. A mixture of 4-nitro-1*H*-pyrazole **31** (44.3 mmol), Pd/c (500 mg) in anhydrous methanol (50 mL) under a balloon of hydrogen, was stirred at room temperature

for 3h. The mixture was filtered through a celite pad and evaporated to give 4-amino-1*H*-pyrazole **32**. To a solution of 4-amino-1*H*-pyrazole **32** (36.1 mmol) in CH<sub>2</sub>Cl<sub>2</sub> (20 mL) were added dropwise Boc<sub>2</sub>O (36.1 mmol) in CH<sub>2</sub>Cl<sub>2</sub> (10 mL) and TEA (108,4 mmol) at 0°C then the mixture was stirred at room temperature for 3h. The reaction mixture was washed with HCl (1M, 20 mL × 2), water (20 mL × 2), brine (20 mL), dried over anhydrous Na<sub>2</sub>SO<sub>4</sub>. The result solution was concentrated to yield a crude product *tert*-butyl 1*H*-pyrazol-4-ylcarbamate **33**.

Scheme 1. Synthetic Scheme for compounds **3-28**<sup>a</sup>

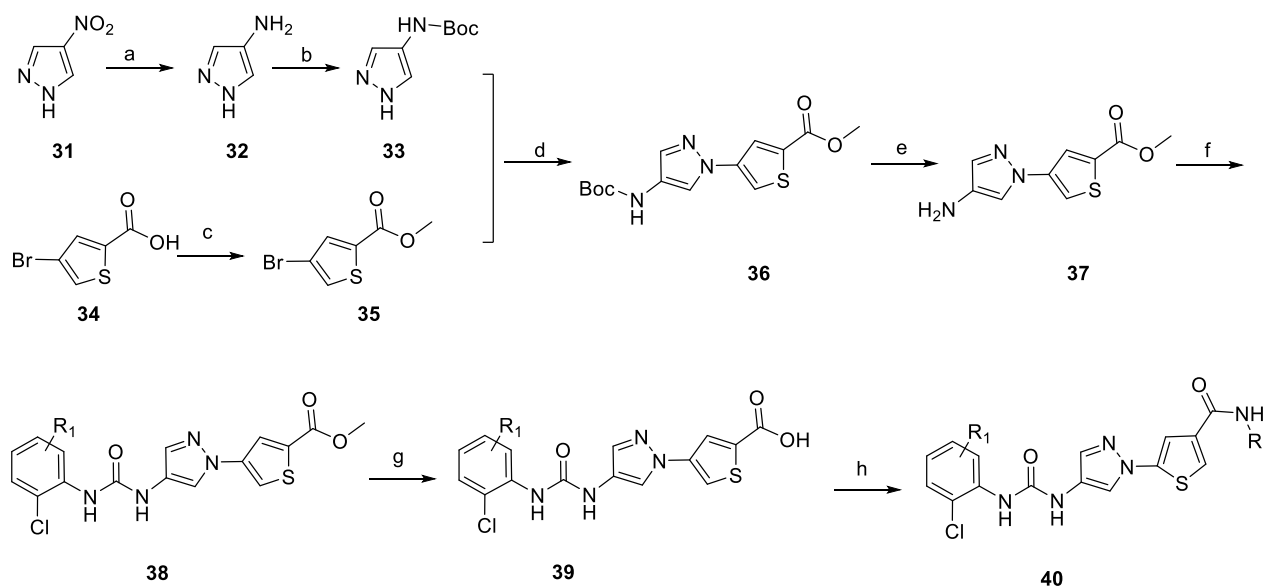

<sup>a</sup>Reagent and Conditions : (a) Pd/C, MeOH, H<sub>2</sub>; (b) Boc<sub>2</sub>O, TEA, DCM, 0→25°C (c) H<sub>2</sub>SO<sub>4</sub>, MeOH, reflux; (d) CuI, *trans*-N,N-dimethylcyclohexane-1,2-diamine, K<sub>3</sub>PO<sub>4</sub>, DMF, 110°C (e) HCl/EA; (f) 2-chloroaniline derivative, 4-nitrophenyl carbonylchloride, DIPEA, DCM, 0→25°C (g) NaOH, MeOH/H<sub>2</sub>O; (h) amine, PyBoP, DIPEA, DMF, 0→25°C

To a solution of 4-bromothiophene-2-carboxylic acid **34** (24.15 mmol) in Methanol (50 mL) were added concentrated sulfuric acid (2 mL), and stirred at reflux for 3 h. The mixture was pured into water (50 mL) and extracted with EtOAc (50 mL × 3), then washed with NaHCO<sub>3</sub> (sat., 50 mL × 2), water (50 mL × 2), brine (50 mL), dried over anhydrous Na<sub>2</sub>SO<sub>4</sub>. The resulting solution was concentrated in vacuo to yield crude product methyl 4-bromothiophene-2-carboxylate **35**.

A mixture of *tert*-butyl 1*H*-pyrazol-4-ylcarbamate **33** (16.4 mmol), methyl 4-bromothiophene-2-carboxylate **35** (8.2 mmol), CuI (1.64 mmol), K<sub>3</sub>PO<sub>4</sub> (24.6 mmol), *trans*-N,N-dimethylcyclohexane-1,2-diamine (3.28 mmol) in DMF (30 mL) was purged with nitrogen, and stirred at 110°C for overnight. The reaction mixture was cooled to room temperature, then pured into water (150 mL). The pH of mixture was adjusted to 3-4 via the addition of citric acid (sat.), then the mixture was extracted with EtOAc (100 mL × 3). The organic phases were washed with water (100 mL × 2), brine (100 mL), dried over anhydrous Na<sub>2</sub>SO<sub>4</sub>. The resulting solution was concentrated in vacuo and the residue was purified by flash

column chromatography on silica gel to give *methyl 4-(4-(tert-butoxycarbonylamino)-1H-pyrazol-1-yl)thiophene-2-carboxylate* **36**.

To a solution of *methyl 4-(4-(tert-butoxycarbonylamino)-1H-pyrazol-1-yl)thiophene-2-carboxylate* **36** (7.187 mmol) in HCl/EA (3 mol/L, 30mL) were stirred at room temperature for overnight. The reaction mixture was filtered to give crude product *methyl 4-(4-amino-1H-pyrazol-1-yl)thiophene-2-carboxylate* **37**.

To a solution of 4-Nitrophenyl carbonochloridite (2.77 mmol) in dried CH<sub>2</sub>Cl<sub>2</sub> (5 mL) was added a 2-chloroaniline derivative (3.01 mmol) in dried CH<sub>2</sub>Cl<sub>2</sub> (2 mL) at room temperature and DIPEA (6.93 mmol) at 0°C then stirred at room temperature for 1-2 h. The reaction mixture was added *methyl 4-(4-amino-1H-pyrazol-1-yl)thiophene-2-carboxylate* **37** (2.31 mmol) at room temperature and DIPEA (4.62 mmol) at 0°C then stirred at room temperature for another 1-2 h. The reaction mixture was diluted with EtOAc (20 mL), washed with NaHCO<sub>3</sub> (sat., 20 mL × 3), water (20 mL × 2), brine (20 mL), dried over anhydrous Na<sub>2</sub>SO<sub>4</sub>. The resulting solution was concentrated in vacuo, and the residue was purified by chromatography on silica gel (dichloromethane/methanol) to give *methyl 4-(4-(3-(2-chlorophenyl)ureido)-1H-pyrazol-1-yl)thiophene-2-carboxylate* derivative **38**.

To a solution of *methyl 4-(4-(3-(2-chlorophenyl)ureido)-1H-pyrazol-1-yl)thiophene-2-carboxylate* **38** (0.90 mmol) in methanol (10 mL) were dropwise added NaOH in H<sub>2</sub>O (30%, 10 mL), stirred at room temperature for overnight. The reaction mixture was washed with petroleum ether (20 mL × 2), adjusted pH with citric acid (sat.) to 4-5, then extracted with EtOAc (20 mL × 3). The organic phases were washed with water (20 mL × 2), water (20 mL × 2), brine (20 mL), dried over anhydrous Na<sub>2</sub>SO<sub>4</sub>. The resulting solution was concentrated in vacuo to give crude product *4-(4-(3-(2-chlorophenyl)ureido)-1H-pyrazol-1-yl)thiophene-2-carboxylic acid* **39**.

To a solution of *4-(4-(3-(2-chlorophenyl)ureido)-1H-pyrazol-1-yl)thiophene-2-carboxylic acid* **39** (0.55 mmol) in anhydrous dimethyl formamide (3 mL) were added PyBop (0.83 mmol), DIPEA (1.66 mmol), and *an amine* (0.83 mmol) at 0°C then stirred at room temperature for overnight. The reaction mixture was pured into water (20 mL), then extracted with EtOAc (10 mL × 3). The organic phases were washed with water (10 mL × 2), brine (10 mL), dried over anhydrous Na<sub>2</sub>SO<sub>4</sub>. The resulting solution was concentrated in vacuo and the residue was purified by preparative HPLC to give **final products 6-28**.

## 1.2 Characterization of inhibitors 3-28.

**N-(azetidin-3-yl)-2-(4-(3-(2-chlorophenyl)ureido)-1H-pyrazol-1-yl)thiazole-4-carboxamide (3) .**

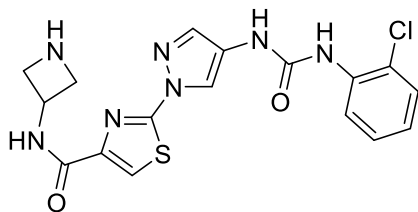

A similar scheme as described in Scheme 1 was used to prepare **3** by replacing the thiophene derivative **34** with a thiozole analog.  $^1\text{H-NMR}$  (400 MHz, DMSO):  $\delta$  9.66 (s, 1 H), 9.13 (d,  $J = 18$  Hz, 1 H), 8.76 (s, 1 H), 8.64 (b, 1 H), 8.49 (s, 1 H), 8.14 (d,  $J = 11$  Hz, 1 H), 8.09 (s, 1 H), 7.90 (s, 1 H), 7.48 (d,  $J = 20$  Hz, 1 H), 7.33 (t,  $J = 20$  Hz, 1 H), 7.07 (t,  $J = 19$  Hz, 1 H), 4.85 (dd,  $J = 20$  Hz, 39 Hz, 1 H), 4.19 (m, 4 H). LC-MS, single peak monitoring at 254 nm. Formula:  $\text{C}_{17}\text{H}_{16}\text{ClN}_7\text{O}_2\text{S}$ , MS (ESI)  $m/z$ :  $[\text{M} + \text{H}]$  calcd: 418; found 418.

**N-(azetidin-3-yl)-5-(4-(3-(2-chlorophenyl)ureido)-1H-pyrazol-1-yl)thiophene-2-carboxamide (4).**

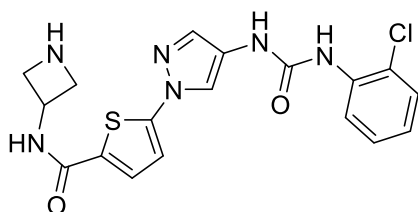

A similar scheme as described in Scheme 1 was used to prepare **4** by replacing the thiophene derivative **34** with the corresponding thiophene analog.  $^1\text{H-NMR}$  (400 MHz, DMSO):  $\delta$  9.46 (s, 1H), 9.09 – 9.07 (m, 1H), 8.71 – 8.65 (m, 1H), 8.47 (s, 1H), 8.38 (s, 1H), 8.17 – 8.15 (m, 1H), 7.80 (s, 1H), 7.68 – 7.66 (m, 1H), 7.47 – 7.45 (m, 1H), 7.38 – 7.37 (m, 1H), 7.32 – 7.28 (m, 1H), 7.06 – 7.02 (m, 1H), 4.76 – 4.71 (m, 1H), 4.18 – 4.08 (m, 4H). LC-MS, single peak monitoring at 254 nm. Chemical Formula:  $\text{C}_{18}\text{H}_{17}\text{ClN}_6\text{O}_2\text{S}$ , MS (ESI)  $m/z$ :  $[\text{M} + \text{H}]$  calcd: 417; found 417.

**N-(azetidin-3-yl)-5-(4-(3-(2-chlorophenyl)ureido)-1H-pyrazol-1-yl)thiophene-3-carboxamide (5).**

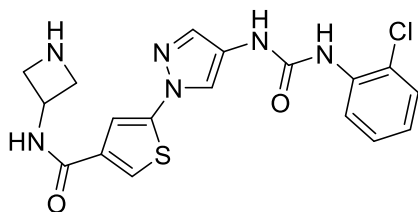

A similar scheme as described in Scheme 1 was used to prepare **5** by replacing the thiophene derivative **34** with a 2-Br thiophene analog.  $^1\text{H NMR}$  (400 MHz, DMSO): LC-MS, single peak monitoring at 254 nm. Chemical Formula:  $\text{C}_{18}\text{H}_{17}\text{ClN}_6\text{O}_2\text{S}$ , MS (ESI)  $m/z$ :  $[\text{M} + \text{H}]$  calcd: 417; found 417.

**N-(azetidin-3-yl)-4-(4-(3-(2-chlorophenyl)ureido)-1H-pyrazol-1-yl)thiophene-2-carboxamide (6).**

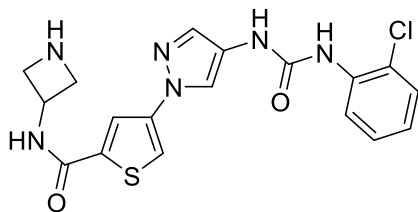

Scheme 1 was used to prepare **6**. <sup>1</sup>H-NMR (400 MHz, DMSO): (NMR recorded for the TFA salt form of **6**) δ 9.463 (s, 1 H), 9.303-9.287 (d, *J* = 6.4 Hz, 1 H), 8.719 (s, 2 H), 8.414-8.383 (d, *J* = 12.4 Hz, 2 H), 8.265 (s, 1 H), 8.187-8.166 (d, *J* = 8.4 Hz, 1 H), 7.986 (s, 1 H), 7.741 (s, 1 H), 7.471-7.451 (d, *J* = 8.0 Hz, 1 H), 7.318-7.287 (t, *J* = 16.0 Hz, 1 H), 7.053-7.014 (t, *J* = 15.6 Hz, 1 H), 4.810-4.753 (q, *J* = 7.6 Hz, 1 H), 4.204-4.157 (t, *J* = 18.8 Hz, 2 H), 4.116-4.069 (t, *J* = 18.8 Hz, 2 H). LC-MS, single peak monitoring at 254 nm. Chemical Formula: C<sub>18</sub>H<sub>17</sub>ClN<sub>6</sub>O<sub>2</sub>S, MS (ESI) *m/z*: [M + H] calcd: 417; found 417.

**4-(4-(3-(2-chlorophenyl)ureido)-1H-pyrazol-1-yl)-N-methylthiophene-2-carboxamide (7).**

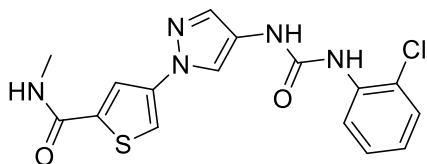

Scheme 1 was used to prepare **7**. <sup>1</sup>H-NMR (400 MHz, DMSO): δ 9.40 (s, 1 H), 8.65 (m, 1 H), 8.36 (d, *J* = 20 Hz, 2 H), 8.19 (d, *J* = 20 Hz, 2 H), 7.87 (s, 1 H), 7.72 (s, 1 H), 7.46 (dd, *J* = 20 Hz, *J* = 3 Hz, 1 H), 7.31 (t, *J* = 18 Hz, 1 H), 7.03 (t, *J* = 18 Hz, 1 H), 2.78 (s, 3 H). LC-MS, single peak monitoring at 254 nm. Chemical Formula: C<sub>16</sub>H<sub>14</sub>ClN<sub>5</sub>O<sub>2</sub>S, MS (ESI) *m/z*: [M + H] calcd: 376; found 376.

**4-(4-(3-(2-chlorophenyl)ureido)-1H-pyrazol-1-yl)-N-cyclopropylthiophene-2-carboxamide (8).**

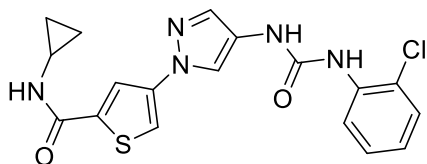

Scheme 1 was used to prepare **8**. <sup>1</sup>H-NMR (400 MHz, DMSO): δ 9.395 (s, 1 H), 8.640-8.632 (d, *J* = 3.2 Hz, 1 H), 8.365-8.350 (d, *J* = 6 Hz, 2 H), 8.197-8.174 (d, *J* = 9.2 Hz, 2 H), 7.870 (s, 1 H), 7.709 (s, 1 H), 7.466-7.446 (d, *J* = 8 Hz, 1 H), 7.315-7.276 (t, *J* = 8 Hz, 1 H), 7.046-7.008 (t, *J* = 7.6 Hz, 1 H), 2.827-2.818 (d, *J* = 3.6 Hz, 1 H), 0.719-0.702 (d, *J* = 6.8 Hz, 2 H), 0.582 (s, 2 H). LC-MS, single peak monitoring at 254 nm. Chemical Formula: C<sub>18</sub>H<sub>16</sub>ClN<sub>5</sub>O<sub>2</sub>S, MS (ESI) *m/z*: [M + H] calcd: 402; found 402.

**(R)-4-(4-(3-(2-chlorophenyl)ureido)-1H-pyrazol-1-yl)-N-(pyrrolidin-3-yl)thiophene-2-carboxamide (9).**

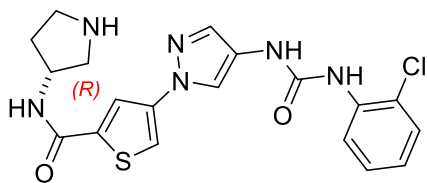

Scheme 1 was used to prepare **9**.  $^1\text{H-NMR}$  (400 MHz, DMSO):  $\delta$  9.443 (s, 1 H), 8.846 (s, 2 H), 8.791-8.776 (d,  $J = 6$  Hz, 1 H), 8.403-8.387 (d,  $J = 6$  Hz, 2 H), 8.275 (s, 1 H), 8.181-8.160 (d,  $J = 8$  Hz, 1 H), 7.952 (s, 1 H), 7.730 (s, 1 H), 7.468-7.449 (d,  $J = 8$  Hz, 1 H), 7.317-7.279 (t,  $J = 15$  Hz, 1 H), 7.051-7.014 (t,  $J = 15$  Hz, 1 H), 4.490-4.450 (m, 1 H), 3.467-3.420 (m, 2 H), 3.202-3.161 (m, 2 H), 2.260-2.171 (m, 1 H), 2.071-1.986 (m, 1 H). LC-MS, single peak monitoring at 254 nm. Chemical Formula:  $\text{C}_{19}\text{H}_{19}\text{ClN}_6\text{O}_2\text{S}$ , MS (ESI)  $m/z$ :  $[\text{M} + \text{H}]$  calcd: 431; found 431.

**(R)-4-(4-(3-(2-chlorophenyl)ureido)-1H-pyrazol-1-yl)-N-(1-methylpyrrolidin-3-yl)thiophene-2-carboxamide (10).**

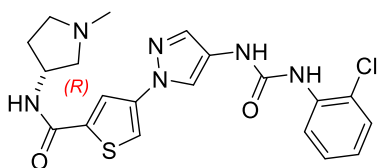

Scheme 1 was used to prepare **10**. (NMR recorded for the TFA salt form of **10**)  $^1\text{H-NMR}$  (400 MHz, DMSO):  $\delta$  9.866 (s, 1 H), 9.433 (s, 1 H), 8.915-8.830 (m, 1 H), 8.406-8.379 (d,  $J = 11$  Hz, 2 H), 8.280 (s, 1 H), 8.181-8.161 (d,  $J = 8$  Hz, 1 H), 7.957 (s, 1 H), 7.732 (s, 1 H), 7.468-7.449 (d,  $J = 8$  Hz, 1 H), 7.316-7.279 (t,  $J = 15$  Hz, 1 H), 7.051-7.013 (t,  $J = 15$  Hz, 1 H), 4.530 (s, 1 H), 3.916-3.608 (m, 2 H), 3.252-3.026 (m, 2 H), 2.876 (s, 3 H), 2.328-2.008 (m, 2 H). LC-MS, single peak monitoring at 254 nm. Chemical Formula:  $\text{C}_{20}\text{H}_{21}\text{ClN}_6\text{O}_2\text{S}$ , MS (ESI)  $m/z$ :  $[\text{M} + \text{H}]$  calcd: 445; found 445.

**(R)-4-(4-(3-(2-chlorophenyl)ureido)-1H-pyrazol-1-yl)-N-(1-(methyl-d3)pyrrolidin-3-yl)thiophene-2-carboxamide (11).**

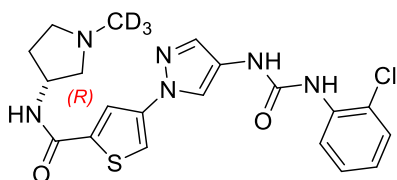

Scheme 1 was used to prepare **11**. (NMR recorded for the TFA salt form of **11**)  $^1\text{H-NMR}$  (400 MHz, DMSO):  $\delta$  9.879 (s, 1 H), 9.442 (s, 1 H), 8.857 (s, 1 H), 8.403-8.385 (d,  $J = 7$  Hz, 2 H), 8.277 (s, 1 H), 8.179-8.158 (d,  $J = 8$  Hz, 1 H), 7.954 (s, 1 H), 7.731 (s, 1 H), 7.467-7.447 (d,  $J = 8$  Hz, 1 H), 7.315-7.276 (d,  $J = 16$  Hz, 1 H), 7.051-7.012 (d,  $J = 16$  Hz, 1 H),

4.530 (s, 1 H), 3.919-3.598 (m, 2 H), 3.275-3.123 (m, 2 H), 2.327-2.121 (m, 2 H). LC-MS, single peak monitoring at 254 nm. Chemical Formula: C<sub>20</sub>H<sub>18</sub>D<sub>3</sub>CIN<sub>6</sub>O<sub>2</sub>S, MS (ESI) m/z: [M + H] calcd: 448; found 448.

**(S)-4-(4-(3-(2-chlorophenyl)ureido)-1H-pyrazol-1-yl)-N-(1-methylpyrrolidin-3-yl)thiophene-2-carboxamide (12).**

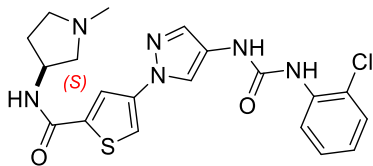

Scheme 1 was used to prepare **12**. (NMR recorded for the TFA salt form of **12**) <sup>1</sup>H-NMR (400 MHz, DMSO): δ 9.938 (s, 1 H), 9.449 (s, 1 H), 8.850 (s, 1 H), 8.402-8.385 (d, J = 7 Hz, 2 H), 8.285 (s, 1 H), 8.181-8.160 (d, J = 8 Hz, 2 H), 7.955 (s, 1 H), 7.468-7.448 (d, J = 8 Hz, 1 H), 7.316-7.277 (t, J = 16 Hz, 1 H), 7.051-7.012 (t, J = 16 Hz, 1 H), 4.538 (s, 1 H), 3.733-3.599 (m, 2 H), 3.111-3.098 (m, 2 H), 2.844 (s, 3 H), 2.327-2.052 (m, 2 H). LC-MS, single peak monitoring at 254 nm. Chemical Formula: C<sub>20</sub>H<sub>21</sub>CIN<sub>6</sub>O<sub>2</sub>S, MS (ESI) m/z: [M + H] calcd: 445; found 445.

**(S)-4-(4-(3-(2-chlorophenyl)ureido)-1H-pyrazol-1-yl)-N-(1-isopropylpyrrolidin-3-yl)thiophene-2-carboxamide (13).**

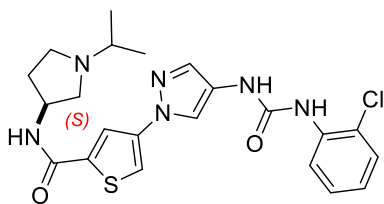

Scheme 1 was used to prepare **13**. <sup>1</sup>H-NMR (400 MHz, DMSO): (NMR recorded for the TFA salt form of **13**) δ 9.764 (s, 1 H), 9.447-9.427 (d, J = 8 Hz, 1 H), 8.904-8.793 (m, 1 H), 8.403-8.385 (d, J = 7 Hz, 2 H), 8.304-8.265 (d, J = 16 Hz, 1 H), 8.179-8.159 (d, J = 8 Hz, 1 H), 7.960 (s, 1 H), 7.732 (s, 1 H), 7.468-7.448 (d, J = 8 Hz, 1 H), 7.315-7.277 (t, J = 15 Hz, 1 H), 7.051-7.013 (m, 1 H), 4.515-4.485 (t, J = 12 Hz, 1 H), 3.844-3.830 (m, 1 H), 3.665-3.576 (m, 1 H), 3.493-3.457 (t, J = 14 Hz, 2 H), 3.231-3.070 (m, 1 H), 2.406-2.209 (m, 2 H), 1.284-1.269 (d, J = 6 Hz, 6 H). LC-MS, single peak monitoring at 254 nm. Chemical Formula: C<sub>22</sub>H<sub>25</sub>CIN<sub>6</sub>O<sub>2</sub>S, MS (ESI) m/z: [M + H] calcd: 473; found 473.

**4-(4-(3-(2-chlorophenyl)ureido)-1H-pyrazol-1-yl)-N-(1-methylpiperidin-4-yl)thiophene-2-carboxamide (14).**

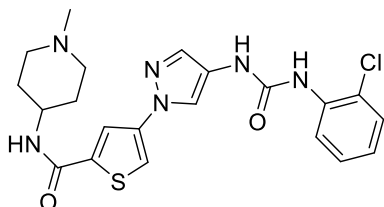

Scheme 1 was used to prepare **14**. (NMR recorded for the TFA salt form of **14**)  $^1\text{H-NMR}$  (400 MHz, DMSO):  $\delta$  9.432 (s, 2 H), 8.685-8.666 (d,  $J = 8$  Hz, 1 H), 8.385 (s, 2 H), 8.290 (s, 1 H), 8.183-8.163 (d,  $J = 8$  Hz, 1 H), 7.911 (s, 1 H), 7.719 (s, 1 H), 7.469-7.449 (d,  $J = 8$  Hz, 1 H), 7.315-7.276 (t,  $J = 16$  Hz, 1 H), 7.051-7.012 (t,  $J = 16$  Hz, 1 H), 3.991-3.975 (d,  $J = 6$  Hz, 1 H), 3.489-3.460 (d,  $J = 12$  Hz, 2 H), 3.112-3.086 (d,  $J = 10$  Hz, 2 H), 2.777 (s, 3 H), 2.067-2.033 (d,  $J = 16$  Hz, 2 H), 1.792-1.703 (m, 2 H). LC-MS, single peak monitoring at 254 nm. Chemical Formula:  $\text{C}_{21}\text{H}_{23}\text{ClN}_6\text{O}_2\text{S}$ , MS (ESI)  $m/z$ :  $[\text{M} + \text{H}]$  calcd: 459; found 459.

**4-(4-(3-(2-chlorophenyl)ureido)-1H-pyrazol-1-yl)-N-(tetrahydro-2H-pyran-4-yl)thiophene-2-carboxamide (15).**

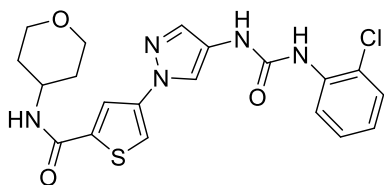

Scheme 1 was used to prepare **15**.  $^1\text{H-NMR}$  (400 MHz, DMSO):  $\delta$  9.398 (s, 1 H), 8.531-8.513 (d,  $J = 7$  Hz, 2 H), 8.390-8.356 (d,  $J = 14$  Hz, 1 H), 8.296 (s, 1 H), 8.199-8.178 (d,  $J = 8$  Hz, 1 H), 7.877 (s, 1 H), 7.716 (s, 1 H), 7.467-7.447 (d,  $J = 8$  Hz, 1 H), 7.317-7.279 (t,  $J = 8$  Hz, 1 H), 7.047-7.009 (t,  $J = 15$  Hz, 1 H), 3.951 (s, 1 H), 3.896-3.872 (d,  $J = 10$  Hz, 2 H), 3.413-3.384 (t,  $J = 12$  Hz, 2 H), 1.792-1.766 (d,  $J = 10$  Hz, 2 H), 1.606-1.526 (m, 2 H). LC-MS, single peak monitoring at 254 nm. Chemical Formula:  $\text{C}_{20}\text{H}_{20}\text{ClN}_5\text{O}_3\text{S}$ , MS (ESI)  $m/z$ :  $[\text{M} + \text{H}]$  calcd: 446; found 446.

**(R)-4-(4-(3-(2-chlorophenyl)ureido)-1H-pyrazol-1-yl)-N-(tetrahydrofuran-3-yl)thiophene-2-carboxamide (16).**

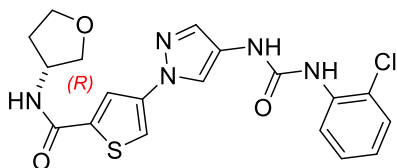

Scheme 1 was used to prepare **16**.  $^1\text{H-NMR}$  (400 MHz, DMSO):  $\delta$  9.392 (s, 1 H), 8.749-8.733 (d,  $J = 6.4$  Hz, 1 H), 8.377 (s, 1 H), 8.347-8.332 (d,  $J = 6.0$  Hz, 2 H), 8.196-8.175 (d,  $J = 8.4$  Hz, 1 H), 7.879 (s, 1 H), 7.714 (s, 1 H), 7.464-7.444 (d,  $J = 8.0$  Hz, 1 H), 7.315-7.276 (t,  $J = 15.6$  Hz, 1 H), 7.046-7.077 (t,  $J = 15.6$  Hz, 1 H), 4.441 (s, 1 H), 3.897-3.824 (m, 2 H), 3.753-3.698 (dd,  $J = 13.6, 8.0$  Hz, 1 H), 3.623-3.590 (dd,  $J = 9.6, 4.0$  Hz, 1 H), 2.211-2.123 (m, 1 H), 1.954-1.894 (m, 1 H). LC-MS, single peak monitoring at 254 nm. Chemical Formula:  $\text{C}_{19}\text{H}_{18}\text{ClN}_5\text{O}_3\text{S}$ , MS (ESI)  $m/z$ :  $[\text{M} + \text{H}]$  calcd: 432; found 432.

**4-(4-(3-(2-chlorophenyl)ureido)-1H-pyrazol-1-yl)-N-(oxetan-3-yl)thiophene-2-carboxamide (17).**



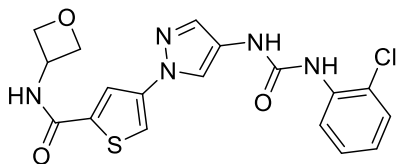

Scheme 1 was used to prepare **17**.  $^1\text{H-NMR}$  (400 MHz, DMSO):  $\delta$  9.407 (s, 1 H), 9.323-9.307 (d,  $J = 6.4$  Hz, 1 H), 8.399 (s, 1 H), 8.358-8.339 (d,  $J = 7.6$  Hz, 2 H), 8.200-8.180 (d,  $J = 8.0$  Hz, 1 H), 7.919 (s, 1 H), 7.731 (s, 1 H), 7.468-7.448 (d,  $J = 8.0$  Hz, 1 H), 7.319-7.280 (t,  $J = 15.6$  Hz, 1 H), 7.048-7.010 (t,  $J = 15.2$  Hz, 1 H), 5.012-4.961 (q,  $J = 6.8$  Hz, 1 H), 4.797-4.763 (t,  $J = 13.6$  Hz, 2 H), 4.609-4.579 (t,  $J = 12.0$  Hz, 2 H). LC-MS, single peak monitoring at 254 nm. Chemical Formula:  $\text{C}_{18}\text{H}_{16}\text{ClN}_5\text{O}_3\text{S}$ , MS (ESI)  $m/z$ :  $[\text{M} + \text{H}]$  calcd: 418; found 418.

**4-(4-(3-(2-chlorophenyl)ureido)-1H-pyrazol-1-yl)-N-(3-methyloxetan-3-yl)thiophene-2-carboxamide (18).**

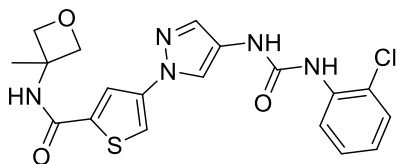

Scheme 1 was used to prepare **18**.  $^1\text{H-NMR}$  (400 MHz, DMSO):  $\delta$  9.44 (s, 1 H), 9.10 (s, 1 H), 8.39 (s, 1 H), 8.38 (s, 1 H), 8.26 (d,  $J = 4.0$  Hz, 1 H), 8.19 (dd,  $J = 4$  Hz, 21 Hz, 1H), 7.91 (d,  $J = 3$  Hz, 1 H), 7.73 (s, 1 H), 7.46 (dd,  $J = 4.0$  Hz, 20 Hz, 1 H), 7.30 (t,  $J = 19$  Hz, 1 H), 7.03 (t,  $J = 19$  Hz, 1 H), 4.72 (d,  $J = 15$  Hz, 2 H), 4.38 (t,  $J = 16$  Hz, 2 H), 1.61 (s, 3H). LC-MS, single peak monitoring at 254 nm. Chemical Formula:  $\text{C}_{19}\text{H}_{18}\text{ClN}_5\text{O}_3\text{S}$ , MS (ESI)  $m/z$ :  $[\text{M} + \text{H}]$  calcd: 432; found 432.

**4-(4-(3-(2-chlorophenyl)ureido)-1H-pyrazol-1-yl)-N-((1-methylpiperidin-4-yl)methyl)thiophene-2-carboxamide (19).**

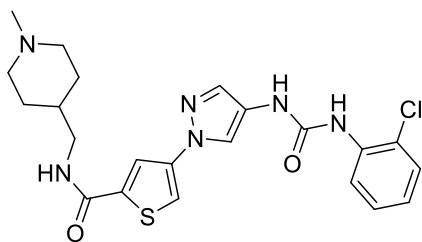

Scheme 1 was used to prepare **19**.  $^1\text{H-NMR}$  (400 MHz, DMSO):  $\delta$  9.449 (s, 1 H), 9.218 (s, 1 H), 8.775-8.748 (t, 1 H), 8.383 (s, 1 H), 8.252 (s, 1 H), 8.180-8.159 (d,  $J = 8.4$  Hz, 1 H), 7.897 (s, 1 H), 7.716 (s, 1 H), 7.467-7.447 (d,  $J = 8.0$  Hz, 1 H), 7.314-7.274 (t,  $J = 16.0$  Hz, 1 H), 7.050-7.011 (t,  $J = 15.6$  Hz, 1 H), 3.192-3.163 (t,  $J = 11.6$  Hz, 2 H), 2.912-2.889 (d,  $J = 9.2$  Hz, 2 H), 2.800-2.669 (m,  $J = 52.4$  Hz, 3 H), 2.005-1.774 (m,  $J = 92.4$  Hz, 4 H), 1.414-1.351 (t,  $J = 25.6$  Hz, 2

H), 0.863-0.800 (m,  $J = 25.2$  Hz, 1 H). LC-MS, single peak monitoring at 254 nm. Chemical Formula: C<sub>22</sub>H<sub>25</sub>ClN<sub>6</sub>O<sub>2</sub>S, MS (ESI)  $m/z$ : [M + H] calcd: 473; found 473.

**4-(4-(3-(2-chlorophenyl)ureido)-1H-pyrazol-1-yl)-N-(piperidin-4-ylmethyl)thiophene-2-carboxamide (20).**

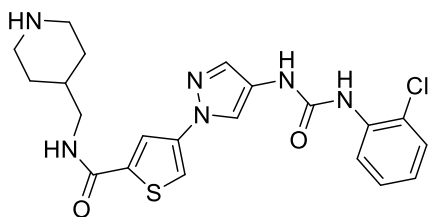

Scheme 1 was used to prepare **20**. <sup>1</sup>H-NMR (400 MHz, DMSO):  $\delta$  9.438 (s, 1 H), 8.771-8.758 (d,  $J = 5.2$  Hz, 1 H), 8.486 (s, 1 H), 8.385-8.377 (d,  $J = 3.2$  Hz, 2 H), 8.256 (s, 1 H), 8.185-8.165 (d,  $J = 8.0$  Hz, 2 H), 7.898 (s, 1 H), 7.716 (s, 1 H), 7.470-7.450 (d,  $J = 8.0$  Hz, 1 H), 7.319-7.276 (t,  $J = 17.2$  Hz, 1 H), 7.051-7.013 (t,  $J = 15.2$  Hz, 1 H), 3.357-3.296 (d,  $J = 24.4$  Hz, 2 H), 3.184 (s, 1 H), 2.870-2.841 (d,  $J = 11.6$  Hz, 2 H), 1.837-1.806 (m,  $J = 12.4$  Hz, 3 H), 1.349-1.319 (d,  $J = 12.0$  Hz, 2 H). LC-MS, single peak monitoring at 254 nm. Chemical Formula: C<sub>21</sub>H<sub>23</sub>ClN<sub>6</sub>O<sub>2</sub>S, MS (ESI)  $m/z$ : [M + H] calcd: 459; found 459.

**(R)-4-(4-(3-(2-chlorophenyl)ureido)-1H-pyrazol-1-yl)-N-((1-methylpyrrolidin-3-yl)methyl)thiophene-2-carboxamide (21).**

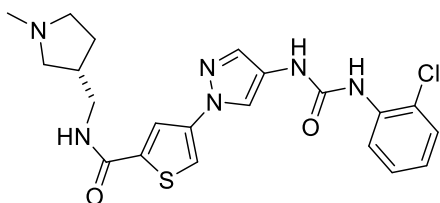

Scheme 1 was used to prepare **21**. <sup>1</sup>H-NMR (400 MHz, DMSO):  $\delta$  9.755 (s, 1 H), 9.429 (s, 1 H), 8.822 (s, 1 H), 8.387-8.373 (d,  $J = 5.6$  Hz, 2 H), 8.245-8.242 (d,  $J = 1.2$  Hz, 1 H), 8.185-8.161 (dd,  $J = 8.4, 1.2$  Hz, 1 H), 7.917-7.914 (d,  $J = 1.2$  Hz, 1 H), 7.721 (s, 1 H), 7.471-7.448 (dd,  $J = 8.0, 1.2$  Hz, 2 H), 7.317-7.252 (m, 1 H), 7.054-7.012 (m, 1 H), 3.667-3.565 (d,  $J = 40.8$  Hz, 2 H), 3.188-3.022 (m, 2 H), 2.839 (s, 3 H), 2.757 (s, 1 H), 2.208-1.665 (m, 2 H). LC-MS, single peak monitoring at 254 nm. Chemical Formula: C<sub>21</sub>H<sub>23</sub>ClN<sub>6</sub>O<sub>2</sub>S, MS (ESI)  $m/z$ : [M + H] calcd: 459; found 459.

**(R)-4-(4-(3-(2-chlorophenyl)ureido)-1H-pyrazol-1-yl)-N-((tetrahydrofuran-3-yl)methyl)thiophene-2-carboxamide (22).**

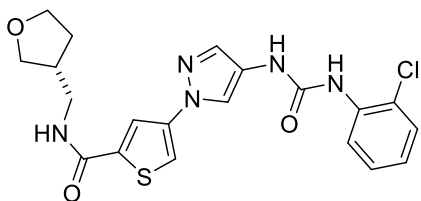

Scheme 1 was used to prepare **22**.  $^1\text{H-NMR}$  (400 MHz, DMSO):  $\delta$  9.393 (s, 1 H), 8.769-8.742 (t,  $J = 10.8$  Hz, 1 H), 8.383-8.351 (d,  $J = 12.8$  Hz, 2 H), 8.249 (s, 1 H), 8.197-8.176 (d,  $J = 8.4$  Hz, 1 H), 7.884 (s, 1 H), 7.718 (s, 1 H), 7.466-7.447 (d,  $J = 7.6$  Hz, 1 H), 7.316-7.276 (t,  $J = 16.0$  Hz, 1 H), 7.047-7.007 (t,  $J = 16.0$  Hz, 1 H), 3.753-3.677 (m, 2 H), 3.650-3.594 (m, 2 H), 3.489-3.456 (m, 2 H), 2.023-1.912 (m, 2 H), 1.641-1.560 (m, 1 H). LC-MS, single peak monitoring at 254 nm. Chemical Formula:  $\text{C}_{20}\text{H}_{20}\text{ClN}_5\text{O}_3\text{S}$ , MS (ESI)  $m/z$ :  $[\text{M} + \text{H}]$  calcd: 446; found 446.

**(S)-4-(4-(3-(2-chlorophenyl)ureido)-1H-pyrazol-1-yl)-N-((1-methylpyrrolidin-2-yl)methyl)thiophene-2-carboxamide (23).**

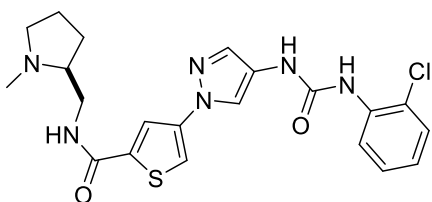

Scheme 1 was used to prepare **23**. LC-MS, single peak monitoring at 254 nm. Chemical Formula:  $\text{C}_{21}\text{H}_{23}\text{ClN}_6\text{O}_2\text{S}$ , MS (ESI)  $m/z$ :  $[\text{M} + \text{H}]$  calcd: 459; found 459.

**4-(4-(3-(2-chlorophenyl)ureido)-1H-pyrazol-1-yl)-N-((tetrahydro-2H-pyran-4-yl)methyl)thiophene-2-carboxamide (24).**

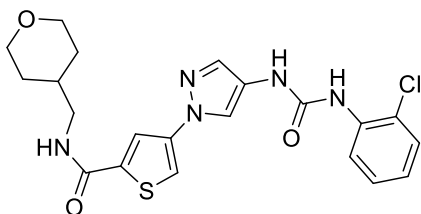

Scheme 1 was used to prepare **24**.  $^1\text{H-NMR}$  (400 MHz, DMSO):  $\delta$  9.393 (s, 1 H), 8.676-8.648 (t,  $J = 11.2$  Hz, 1 H), 8.375-8.349 (d,  $J = 10.4$  Hz, 2 H), 8.259-8.255 (d,  $J = 1.6$  Hz, 1 H), 8.197-8.173 (dd,  $J = 1.2, 8.4$  Hz, 1 H), 7.868-7.865 (d,  $J = 1.2$  Hz, 1 H), 7.711 (s, 1 H), 7.467-7.444 (dd,  $J = 1.2, 8.0$  Hz, 1 H), 7.314-7.275 (m,  $J = 15.6$  Hz, 1 H), 7.086-7.007 (m, 1 H), 3.865-3.830 (dd,  $J = 2.4, 11.2$  Hz, 2 H), 3.296-3.241 (t,  $J = 22.0$  Hz, 2 H), 3.162-3.131 (t,  $J = 12.4$  Hz, 2 H), 2.024-1.951 (m, 2 H), 1.620-1.588 (d,  $J = 12.8$  Hz, 2 H), 1.468-1.434 (m, 1 H). LC-MS, single peak monitoring at 254 nm. Chemical Formula:  $\text{C}_{21}\text{H}_{22}\text{ClN}_5\text{O}_3\text{S}$ , MS (ESI)  $m/z$ :  $[\text{M} + \text{H}]$  calcd: 460; found 460.

**4-(4-(3-(2-chloro-6-fluorophenyl)ureido)-1H-pyrazol-1-yl)-N-(oxetan-3-yl)thiophene-2-carboxamide (25).**

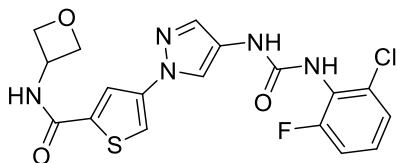

Scheme 1 was used to prepare **25**. <sup>1</sup>H-NMR (400 MHz, DMSO):  $\delta$  9.27 (d,  $J$  = 6.4 Hz, 1H), 8.91 (s, 1H), 8.31 (s, 2H), 8.26 (s, 1H), 7.86 (s, 1H), 7.68 (s, 1H), 7.33 (m, 3H), 4.97 (m, 1H), 4.77 (t, 2H), 4.58 (t, 2H). LC-MS, single peak monitoring at 254 nm. Chemical Formula: C<sub>18</sub>H<sub>15</sub>ClF<sub>2</sub>N<sub>5</sub>O<sub>3</sub>S, MS (ESI)  $m/z$ : [M + H] calcd: 436; found 436.

**4-(4-(3-(2-chloro-4-fluorophenyl)ureido)-1H-pyrazol-1-yl)-N-(oxetan-3-yl)thiophene-2-carboxamide (26).**

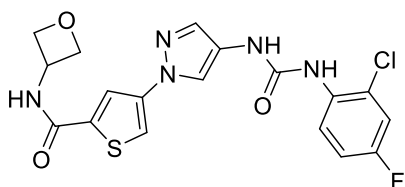

Scheme 1 was used to prepare **26**. <sup>1</sup>H-NMR (400 MHz, DMSO):  $\delta$  9.31 (s, 2H), 8.33-8.38 (t, 3H), 8.10-8.14 (m, 1H), 7.91 (s, 1H), 7.73 (s, 1H), 7.46-7.49 (m, 1H), 7.19-7.24 (m, 1H), 4.96-5.00 (m, 1H), 4.77-4.80 (t, 2H), 4.58-4.61 (t, 2H). LC-MS, single peak monitoring at 254 nm. Chemical Formula: C<sub>18</sub>H<sub>15</sub>ClF<sub>2</sub>N<sub>5</sub>O<sub>3</sub>S, MS (ESI)  $m/z$ : [M + H] calcd: 436; found 436.

**4-(4-(3-(2-chloro-6-fluorophenyl)ureido)-1H-pyrazol-1-yl)-5-methyl-N-(oxetan-3-yl)thiophene-2-carboxamide (27).**

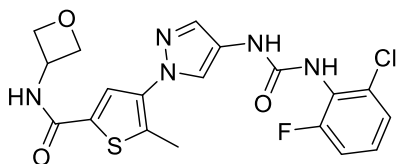

Scheme 1 was used to prepare **27**. <sup>1</sup>H-NMR (400 MHz, DMSO):  $\delta$  9.15 (d,  $J$  = 6.8 Hz, 1H), 8.90 (s, 1H), 8.24 (s, 1H), 8.10 (s, 1H), 8.02 (s, 1H), 7.71 (s, 1H), 7.26-7.40 (m, 3H), 4.92-4.99 (m, 1H), 4.76 (t,  $J$  = 7.0 Hz, 2H), 4.56 (t,  $J$  = 6.4 Hz, 2H), 2.52 (s, 3H). LC-MS, single peak monitoring at 254 nm. Chemical Formula: C<sub>19</sub>H<sub>17</sub>ClF<sub>2</sub>N<sub>5</sub>O<sub>3</sub>S, MS (ESI)  $m/z$ : [M + H] calcd: 450; found 450.

**(R)-4-(4-(3-(2-chloro-6-fluorophenyl)ureido)-1H-pyrazol-1-yl)-5-methyl-N-(tetrahydrofuran-3-yl)thiophene-2-carboxamide (28).**

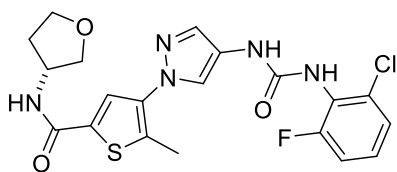

Scheme 1 was used to prepare **28**.  $^1\text{H-NMR}$  (400 MHz, DMSO):  $\delta$  8.90 (s, 1H), 8.59 (d,  $J = 6.4$  Hz, 1H), 8.24 (s, 1H), 8.09 (s, 1H), 8.02 (s, 1H), 7.70 (s, 1H), 7.26-7.39 (m, 3H), 4.37-4.44 (m, 1H), 3.80-3.87 (m, 2H), 3.68-3.73 (m, 1H), 3.55-3.59 (m, 1H), 2.51 (s, 3H), 2.10-2.19 (m, 1H), 1.84-1.91 (m, 1H). LC-MS, single peak monitoring at 254 nm. Chemical Formula:  $\text{C}_{20}\text{H}_{19}\text{ClFN}_5\text{O}_3\text{S}$ , MS (ESI)  $m/z$ :  $[\text{M} + \text{H}]$  calcd: 464; found 464.

## 2.1 JNK-1/2/3 and p38 assays

Homogeneous Time-resolved Fluorescence Assay-Enzyme inhibition studies were performed in 384-well polystyrene homogeneous time-resolved fluorescence plates (Grainier) for 1hr. at ambient temperature ( $\sim 22^\circ\text{C}$ ) with 0.5  $\mu\text{M}$  biotinylated FL-ATF-2, 1.25  $\mu\text{M}$  ATP, 0.75 nM activated JNK3 $\alpha$ 1 (with a control in the absence of kinase for determining the basal signal), JNK2, or JNK1 in 10- $\mu\text{l}$  volumes containing the final concentrations of the following: 50 mM HEPES, pH 7.0, 2.5 mM  $\text{MgCl}_2$ , 0.1 mg/ml bovine serum albumin, 1 mM DL-dithiothreitol, 0.01% Triton X-100 (all from Sigma-Aldrich), and 5% DMSO (with or without compound). A 10-point titration of all compounds was carried out in 3-fold dilutions from 10  $\mu\text{M}$  to 0.5 nM. After 22 min, the kinase reaction was terminated by addition of 10  $\mu\text{l}$  of quenching solution (1X Lance Buffer, detection reagents, streptavidin-xLAPC (200 nM) and europium cryptate-labeled rabbit polyclonal anti-phospho-ATF-2 (1 nM), were from Cis-Bio. The homogeneous time-resolved fluorescence signal was detected using an EnVision plate reader 1 hr post-quenching. The data from four different experiments were averaged and presented as the mean  $\pm$  S.D.  $\text{IC}_{50}$  values were determined by fitting the data to the equation for a four-parameter logistic.

**2.2 JNK3 inhibition assays in rat primary neuron cultures:** Both hippocampal and cortical neurons were isolated from E18 rat embryos and cultured in Neurobasal 1 medium that contains B27 (Brainbits, LLC) plus penicillin/streptomycin (Life Technologies). At the 7<sup>th</sup> day in culture, cells were treated with different concentrations of inhibitors diluted in DMSO and 80 ng/ml Anisomycin for 30 min to activate the endogenous JNK3. At the end of incubation time, whole cell lysates were prepared in RIPA buffer containing 50 mM Tris (pH 8.0), 150 mM NaCl, 2 mM EDTA, 1% NP-40, 0.5% deoxycholate supplemented with 10 mM Na pyrophosphate, 1 mM sodium orthovanadate, 25 mM NaF, 10  $\mu\text{g}/\text{ml}$  leupeptin, 10  $\mu\text{g}/\text{ml}$  aprotinin, 1 mM  $\beta$ -glycerophosphate, and 2 mM PMSF. The lysates were subjected to Western blotting to detect whether inhibitors block JNK3-dependent phosphorylation of APP at T668 and c-jun at S73. Phospho-APP<sup>T668</sup>, phospho-c-jun<sup>S73</sup>, APP, and c-jun antibodies were from Cell Signaling Technology.

**2.3 MTT cytotoxicity assay:** SHSYSY cells were cultured in DMEM/F12 (Life Technologies) supplemented with 10% fetal bovine serum (FBS) and penicillin/streptomycin. A day before the assay, cells were plated at 50,000/well in 96 well plates in the culture medium. Next day, compounds were added at 10  $\mu$ M final concentration, and cells were incubated for 48 hrs at 37°C. After the incubation, cells were subjected to MTT assay using Vybrant MTT Cell Proliferation kit as directed by the vendor (Life Technologies).

**2.4 Kinase panel profiling studies:** The wild-type kinase panel of Reaction Biology Corporation ([www.reactionbiology.com](http://www.reactionbiology.com)) (374 kinases which does not including those lipophilic kinases) was used to perform the profiling studies. An inhibitor concentration of  $\geq$ 100-fold of its JNK3 IC<sub>50</sub> value was generally used in the profiling. Detailed profiling data for inhibitors **17**, **25** and **27** are shown in the Table below:

| Kinase:            | % Enzyme Activity (relative to DMSO controls) |        |                            |        |                             |        |
|--------------------|-----------------------------------------------|--------|----------------------------|--------|-----------------------------|--------|
|                    | Compound 17 (at 5 $\mu$ M)                    |        | Compound 25 (at 5 $\mu$ M) |        | Compound 27 (at 10 $\mu$ M) |        |
|                    | Data 1                                        | Data 2 | Data 1                     | Data 2 | Data 1                      | Data 2 |
| <b>ABL1</b>        | 83.38                                         | 82.39  | 100.85                     | 99.61  | 101.96                      | 101.15 |
| <b>ABL2/ARG</b>    | 92.71                                         | 92.27  | 88.74                      | 84.21  | 122.68                      | 122.22 |
| <b>ACK1</b>        | 85.64                                         | 85.44  | 94.57                      | 85.87  | 106.16                      | 98.53  |
| <b>AKT1</b>        | 95.44                                         | 94.02  | 105.05                     | 102.94 | 104.78                      | 101.26 |
| <b>AKT2</b>        | 89.50                                         | 88.19  | 104.39                     | 103.87 | 89.76                       | 88.94  |
| <b>AKT3</b>        | 87.30                                         | 84.52  | 97.63                      | 96.98  | 94.84                       | 94.19  |
| <b>ALK</b>         | 101.15                                        | 99.78  | 89.19                      | 84.18  | 100.18                      | 99.92  |
| <b>ALK1/ACVRL1</b> | 107.21                                        | 103.64 | 120.21                     | 119.05 | 78.71                       | 78.63  |
| <b>ALK2/ACVR1</b>  | 104.72                                        | 104.38 | 95.68                      | 95.05  | 107.63                      | 104.44 |
| <b>ALK3/BMPR1A</b> | 105.42                                        | 104.59 | 102.62                     | 99.98  | 92.49                       | 84.86  |
| <b>ALK4/ACVR1B</b> | 123.55                                        | 112.23 | 82.02                      | 80.08  | 78.52                       | 78.37  |
| <b>ALK5/TGFBR1</b> | 102.96                                        | 101.31 | 97.42                      | 97.31  | 104.00                      | 103.56 |
| <b>ALK6/BMPR1B</b> | 108.84                                        | 107.90 | 114.21                     | 111.40 | 103.88                      | 100.94 |
| <b>ARAF</b>        | 95.08                                         | 91.90  | 94.43                      | 92.64  | 84.06                       | 83.25  |
| <b>ARK5/NUAK1</b>  | 97.91                                         | 97.71  | 95.21                      | 94.11  | 96.93                       | 96.10  |
| <b>ASK1/MAP3K5</b> | 91.18                                         | 87.11  | 91.07                      | 89.42  | 94.02                       | 89.70  |
| <b>Aurora A</b>    | 105.35                                        | 105.00 | 83.13                      | 82.07  | 88.44                       | 85.37  |
| <b>Aurora B</b>    | 93.04                                         | 91.41  | 69.79                      | 68.59  | 96.38                       | 94.10  |
| <b>Aurora C</b>    | 104.47                                        | 99.98  | 58.49                      | 58.15  | 104.19                      | 101.47 |
| <b>AXL</b>         | 96.72                                         | 93.82  | 73.03                      | 71.80  | 86.60                       | 85.74  |
| <b>BLK</b>         | 79.19                                         | 77.85  | 96.11                      | 95.53  | 111.64                      | 110.69 |
| <b>BMPR2</b>       | 109.83                                        | 99.57  | 77.18                      | 74.94  | 84.46                       | 78.97  |
| <b>BMX/ETK</b>     | 106.00                                        | 99.36  | 96.84                      | 94.77  | 92.91                       | 91.90  |
| <b>BRAF</b>        | 93.33                                         | 86.38  | 99.94                      | 97.46  | 104.84                      | 100.71 |
| <b>BRK</b>         | 118.11                                        | 100.93 | 85.73                      | 85.37  | 78.89                       | 77.07  |
| <b>BRSK1</b>       | 85.45                                         | 84.52  | 99.37                      | 99.31  | 87.80                       | 84.97  |
| <b>BRSK2</b>       | 101.84                                        | 100.62 | 100.00                     | 98.75  | 101.58                      | 99.81  |
| <b>BTK</b>         | 92.58                                         | 91.63  | 89.33                      | 89.05  | 87.63                       | 86.96  |
| <b>c-Kit</b>       | 89.25                                         | 88.34  | 94.05                      | 93.89  | 64.36                       | 63.84  |

|                                 |        |        |        |        |        |        |
|---------------------------------|--------|--------|--------|--------|--------|--------|
| <b>c-MER</b>                    | 92.67  | 92.36  | 77.10  | 76.05  | 102.90 | 100.99 |
| <b>c-MET</b>                    | 101.60 | 100.21 | 86.10  | 84.17  | 76.98  | 74.48  |
| <b>c-Src</b>                    | 91.06  | 85.52  | 98.44  | 97.60  | 96.57  | 96.02  |
| <b>CAMK1a</b>                   | 87.10  | 85.37  | 97.98  | 97.46  | 114.97 | 113.30 |
| <b>CAMK1b</b>                   | 96.26  | 92.06  | 102.48 | 101.77 | 80.14  | 74.09  |
| <b>CAMK1d</b>                   | 103.67 | 101.19 | 99.58  | 98.89  | 104.84 | 104.05 |
| <b>CAMK1g</b>                   | 94.21  | 94.01  | 93.95  | 91.73  | 93.14  | 92.52  |
| <b>CAMK2a</b>                   | 100.41 | 99.62  | 99.44  | 98.52  | 99.68  | 98.98  |
| <b>CAMK2b</b>                   | 104.90 | 103.78 | 99.09  | 95.67  | 100.05 | 99.77  |
| <b>CAMK2d</b>                   | 102.59 | 102.33 | 93.47  | 92.93  | 91.34  | 90.36  |
| <b>CAMK2g</b>                   | 96.39  | 94.54  | 90.14  | 89.86  | 102.19 | 99.23  |
| <b>CAMK4</b>                    | 114.38 | 103.67 | 98.67  | 97.56  | 98.49  | 96.54  |
| <b>CAMKK1</b>                   | 130.50 | 128.91 | 93.74  | 93.63  | 121.11 | 116.36 |
| <b>CAMKK2</b>                   | 91.14  | 84.08  | 80.99  | 78.68  | 111.01 | 109.73 |
| <b>CDC7/DBF4</b>                | 110.97 | 108.83 | 84.27  | 81.54  | 106.89 | 99.54  |
| <b>CDK1/cyclin A</b>            | 95.46  | 94.64  | 86.35  | 85.97  | 105.30 | 103.17 |
| <b>CDK1/cyclin B</b>            | 92.57  | 91.19  | 105.47 | 105.10 | 92.73  | 92.47  |
| <b>CDK1/cyclin E</b>            | 94.72  | 86.44  | 98.36  | 95.05  | 100.09 | 97.13  |
| <b>CDK14/cyclin Y (PFTK1)</b>   | 106.61 | 105.71 | 110.11 | 103.59 | 100.37 | 95.26  |
| <b>CDK16/cyclin Y (PCTAIRE)</b> | 94.81  | 93.16  | 101.27 | 100.38 | 101.76 | 93.30  |
| <b>CDK17/cyclin Y (PCTK2)</b>   | 106.10 | 105.77 | 96.03  | 94.30  | 102.18 | 101.79 |
| <b>CDK18/cyclin Y (PCTK3)</b>   | 101.21 | 98.85  | 91.93  | 89.49  | 118.84 | 117.76 |
| <b>CDK19/cyclin C</b>           | 104.67 | 104.15 | 96.17  | 93.31  | 98.09  | 96.75  |
| <b>CDK2/cyclin A</b>            | 93.61  | 92.31  | 93.81  | 91.26  | 98.34  | 98.06  |
| <b>CDK2/Cyclin A1</b>           | 105.66 | 100.91 | 94.17  | 91.11  | 110.76 | 110.18 |
| <b>CDK2/cyclin E</b>            | 98.99  | 97.70  | 94.59  | 93.28  | 106.26 | 103.08 |
| <b>CDK2/cyclin E2</b>           | 106.94 | 101.91 | 98.88  | 96.32  | 90.79  | 89.27  |
| <b>CDK2/cyclin O</b>            | 93.24  | 91.32  | 94.07  | 93.54  | 105.25 | 105.15 |
| <b>CDK3/cyclin E</b>            | 106.51 | 103.23 | 92.16  | 90.92  | 91.20  | 90.95  |
| <b>CDK3/cyclin E2</b>           | 95.81  | 95.18  | 109.45 | 102.15 | 102.60 | 99.40  |
| <b>CDK4/cyclin D1</b>           | 92.21  | 90.56  | 90.27  | 90.16  | 78.01  | 72.89  |
| <b>CDK4/cyclin D3</b>           | 98.21  | 96.07  | 79.41  | 78.31  | 96.53  | 94.52  |
| <b>CDK5/P25</b>                 | 101.10 | 101.02 | 88.15  | 87.76  | 97.64  | 97.00  |
| <b>CDK5/p35</b>                 | 95.38  | 94.35  | 94.35  | 94.17  | 102.73 | 101.68 |
| <b>CDK6/cyclin D1</b>           | 95.43  | 95.10  | 105.31 | 101.02 | 101.25 | 95.95  |
| <b>CDK6/cyclin D3</b>           | 113.72 | 108.98 | 92.62  | 92.38  | 95.20  | 93.51  |
| <b>CDK7/cyclin H</b>            | 99.70  | 96.56  | 95.80  | 94.87  | 102.77 | 101.79 |
| <b>CDK8/cyclin C</b>            | 101.20 | 100.48 | 99.05  | 98.79  | 92.65  | 91.81  |
| <b>CDK9/cyclin K</b>            | 100.31 | 92.42  | 120.29 | 119.71 | 85.36  | 85.02  |
| <b>CDK9/cyclin T1</b>           | 80.17  | 78.30  | 96.07  | 95.78  | 107.15 | 106.08 |
| <b>CDK9/cyclin T2</b>           | 91.08  | 87.96  | 92.98  | 90.35  | 101.18 | 97.27  |
| <b>CHK1</b>                     | 98.73  | 97.38  | 141.35 | 138.23 | 117.85 | 112.53 |
| <b>CHK2</b>                     | 97.83  | 94.70  | 91.47  | 89.85  | 95.15  | 93.80  |
| <b>CK1a1</b>                    | 98.47  | 93.32  | 76.62  | 74.42  | 81.09  | 80.23  |
| <b>CK1a1L</b>                   | 109.15 | 106.14 | 81.14  | 80.89  | 104.98 | 104.70 |
| <b>CK1d</b>                     | 100.73 | 100.16 | 116.74 | 111.80 | 111.63 | 106.74 |
| <b>CK1epsilon</b>               | 89.59  | 88.97  | 88.62  | 87.18  | 97.93  | 97.52  |
| <b>CK1g1</b>                    | 99.02  | 95.46  | 102.18 | 101.70 | 100.79 | 97.70  |
| <b>CK1g2</b>                    | 98.47  | 94.22  | 90.24  | 89.00  | 103.84 | 99.09  |

|                     |        |        |        |        |        |        |
|---------------------|--------|--------|--------|--------|--------|--------|
| <b>CK1g3</b>        | 103.19 | 100.86 | 92.58  | 91.24  | 91.28  | 90.51  |
| <b>CK2a</b>         | 95.35  | 71.10  | 90.53  | 87.51  | 96.99  | 96.34  |
| <b>CK2a2</b>        | 97.32  | 94.89  | 96.58  | 95.95  | 95.49  | 93.35  |
| <b>CLK1</b>         | 80.96  | 80.50  | 74.91  | 74.16  | 98.36  | 96.78  |
| <b>CLK2</b>         | 103.48 | 103.14 | 112.33 | 108.85 | 104.91 | 99.95  |
| <b>CLK3</b>         | 120.16 | 117.28 | 93.46  | 90.44  | 99.57  | 96.35  |
| <b>CLK4</b>         | 66.05  | 63.23  | 93.23  | 92.90  | 101.58 | 101.37 |
| <b>COT1/MAP3K8</b>  | 92.74  | 92.01  | 93.58  | 87.64  | 104.85 | 104.84 |
| <b>CSK</b>          | 99.19  | 98.31  | 97.48  | 96.48  | 97.97  | 94.91  |
| <b>CTK/MATK</b>     | 99.69  | 97.17  | 100.13 | 99.12  | 97.76  | 97.28  |
| <b>DAPK1</b>        | 104.08 | 98.58  | 98.93  | 97.01  | 104.44 | 101.73 |
| <b>DAPK2</b>        | 102.82 | 101.59 | 101.91 | 97.72  | 99.54  | 97.33  |
| <b>DCAMKL1</b>      | 99.25  | 94.99  | 84.20  | 83.29  | 67.21  | 66.10  |
| <b>DCAMKL2</b>      | 99.89  | 97.52  | 94.31  | 91.97  | 106.96 | 105.46 |
| <b>DDR1</b>         | 98.38  | 95.87  | 88.88  | 84.28  | 83.65  | 83.36  |
| <b>DDR2</b>         | 99.83  | 98.92  | 96.59  | 94.12  | 110.69 | 104.24 |
| <b>DLK/MAP3K12</b>  | 96.45  | 92.39  | 82.16  | 81.42  | nd     | nd     |
| <b>DMPK</b>         | 101.81 | 101.43 | 110.50 | 110.17 | 95.21  | 94.17  |
| <b>DMPK2</b>        | 86.96  | 85.52  | 118.65 | 115.14 | 117.81 | 100.83 |
| <b>DRAK1/STK17A</b> | 98.39  | 98.34  | 89.43  | 89.42  | 111.19 | 107.90 |
| <b>DYRK1/DYRK1A</b> | 85.97  | 85.45  | 75.09  | 74.37  | 95.47  | 94.26  |
| <b>DYRK1B</b>       | 87.00  | 86.59  | 82.78  | 82.19  | 105.31 | 104.26 |
| <b>DYRK2</b>        | 88.23  | 87.06  | 93.61  | 91.95  | 96.34  | 95.63  |
| <b>DYRK3</b>        | 93.30  | 92.61  | 99.24  | 99.09  | 101.28 | 99.17  |
| <b>DYRK4</b>        | 94.62  | 91.60  | 96.15  | 93.54  | 93.69  | 87.29  |
| <b>EGFR</b>         | 99.67  | 98.74  | 89.44  | 85.58  | 98.46  | 95.17  |
| <b>EPHA1</b>        | 99.09  | 98.05  | 88.36  | 87.48  | 88.49  | 86.42  |
| <b>EPHA2</b>        | 101.18 | 95.39  | 97.87  | 97.57  | 101.94 | 100.00 |
| <b>EPHA3</b>        | 103.87 | 102.79 | 96.14  | 95.44  | 109.05 | 104.71 |
| <b>EPHA4</b>        | 100.36 | 98.18  | 89.09  | 87.82  | 116.16 | 113.09 |
| <b>EPHA5</b>        | 96.92  | 93.87  | 95.00  | 92.04  | 105.51 | 103.31 |
| <b>EPHA6</b>        | 99.53  | 99.03  | 95.69  | 95.27  | 80.19  | 78.80  |
| <b>EPHA7</b>        | 102.97 | 100.96 | 91.24  | 89.79  | 98.64  | 95.88  |
| <b>EPHA8</b>        | 102.53 | 101.47 | 93.83  | 92.71  | 91.74  | 90.38  |
| <b>EPHB1</b>        | 100.48 | 99.40  | 96.08  | 92.94  | 100.29 | 98.70  |
| <b>EPHB2</b>        | 101.07 | 99.31  | 99.86  | 98.31  | 109.04 | 107.17 |
| <b>EPHB3</b>        | 95.57  | 84.83  | 96.46  | 95.92  | 97.24  | 95.82  |
| <b>EPHB4</b>        | 97.85  | 97.02  | 98.09  | 94.70  | 93.73  | 93.67  |
| <b>ERBB2/HER2</b>   | 102.80 | 100.91 | 97.00  | 95.53  | 64.09  | 63.27  |
| <b>ERBB4/HER4</b>   | 105.02 | 103.78 | 101.85 | 100.85 | 95.04  | 94.58  |
| <b>ERK1</b>         | 92.80  | 90.11  | 92.37  | 92.07  | 107.04 | 106.53 |
| <b>ERK2/MAPK1</b>   | 109.74 | 104.15 | 85.88  | 83.94  | 90.75  | 85.53  |
| <b>ERK5/MAPK7</b>   | 118.72 | 110.13 | 75.94  | 71.15  | 95.68  | 95.01  |
| <b>ERK7/MAPK15</b>  | 140.43 | 122.73 | 107.57 | 104.76 | 103.00 | 100.48 |
| <b>ERN1/IRE1</b>    | 94.29  | 93.93  | 95.84  | 94.61  | 94.09  | 93.26  |
| <b>ERN2/IRE2</b>    | 100.11 | 100.06 | 100.33 | 98.47  | 80.71  | 67.84  |
| <b>FAK/PTK2</b>     | 95.65  | 95.10  | 88.95  | 87.53  | 104.00 | 103.33 |
| <b>FER</b>          | 101.03 | 100.17 | 89.79  | 89.16  | 89.98  | 89.54  |
| <b>FES/FPS</b>      | 99.35  | 96.09  | 87.84  | 83.88  | 93.73  | 93.20  |
| <b>FGFR1</b>        | 98.53  | 95.93  | 93.20  | 91.44  | 114.41 | 111.37 |
| <b>FGFR2</b>        | 95.60  | 94.71  | 103.03 | 102.55 | 105.57 | 105.21 |
| <b>FGFR3</b>        | 97.78  | 84.94  | 92.01  | 90.95  | 137.06 | 136.20 |



|             |              |              |              |              |              |              |
|-------------|--------------|--------------|--------------|--------------|--------------|--------------|
| FGFR4       | 88.21        | 88.01        | 99.57        | 98.51        | 96.76        | 94.67        |
| FGR         | 90.00        | 89.22        | 95.53        | 95.52        | 80.17        | 70.96        |
| FLT1/VEGFR1 | 101.29       | 96.75        | 86.06        | 82.27        | 84.13        | 82.63        |
| FLT3        | 89.66        | 88.39        | 99.15        | 98.71        | 69.13        | 68.41        |
| FLT4/VEGFR3 | 93.81        | 93.50        | 86.58        | 86.16        | 81.92        | 79.20        |
| FMS         | 105.23       | 104.80       | 98.87        | 97.36        | 103.26       | 100.68       |
| FRK/PTK5    | 97.37        | 96.66        | 95.63        | 95.58        | 87.35        | 86.33        |
| FYN         | 97.83        | 91.46        | 90.28        | 88.53        | 99.85        | 97.10        |
| GCK/MAP4K2  | 104.91       | 101.55       | 95.33        | 90.96        | 90.19        | 88.53        |
| GLK/MAP4K3  | 97.50        | 96.25        | 100.27       | 99.15        | 117.79       | 117.10       |
| GRK1        | 91.88        | 91.85        | 92.91        | 92.72        | 112.87       | 108.66       |
| GRK2        | 96.08        | 96.04        | 106.16       | 104.29       | 106.27       | 106.21       |
| GRK3        | 102.23       | 102.06       | 101.19       | 100.13       | 106.77       | 104.98       |
| GRK4        | 97.03        | 93.20        | 93.61        | 93.46        | 112.87       | 107.95       |
| GRK5        | 97.97        | 97.86        | 101.75       | 100.70       | 112.82       | 110.81       |
| GRK6        | 97.93        | 97.75        | 102.38       | 97.97        | 91.45        | 89.66        |
| GRK7        | 96.38        | 94.88        | 94.04        | 92.57        | 99.89        | 98.35        |
| GSK3a       | 97.42        | 97.03        | 93.53        | 93.48        | 128.22       | 128.04       |
| GSK3b       | 94.97        | 94.45        | 95.66        | 94.78        | 94.86        | 94.56        |
| Haspin      | 111.79       | 109.87       | 110.88       | 108.04       | 92.41        | 92.33        |
| HCK         | 94.03        | 89.72        | 91.33        | 90.95        | 95.04        | 92.55        |
| HGK/MAP4K4  | 81.09        | 80.14        | 90.41        | 81.60        | 93.42        | 92.65        |
| HIPK1       | 96.26        | 92.79        | 91.66        | 91.33        | 115.54       | 114.53       |
| HIPK2       | 101.63       | 100.28       | 92.56        | 92.50        | 102.68       | 98.63        |
| HIPK3       | 97.62        | 96.89        | 98.77        | 96.59        | 88.47        | 84.89        |
| HIPK4       | 100.37       | 97.20        | 110.76       | 103.92       | 98.39        | 97.39        |
| HPK1/MAP4K1 | 132.29       | 127.20       | 92.66        | 89.08        | 99.22        | 95.40        |
| IGF1R       | 95.83        | 94.87        | 94.86        | 94.40        | 101.94       | 101.66       |
| IKKa/CHUK   | 167.10       | 144.34       | 107.75       | 105.68       | 100.80       | 93.70        |
| IKKb/IKBKB  | 95.58        | 95.22        | 94.67        | 94.13        | 86.76        | 82.06        |
| IKKe/IKBKE  | 110.26       | 108.28       | 96.80        | 95.05        | 115.84       | 114.63       |
| IR          | 98.37        | 95.58        | 101.73       | 97.94        | 85.46        | 84.44        |
| IRAK1       | 112.23       | 107.37       | 107.05       | 105.55       | 79.94        | 78.52        |
| IRAK4       | 92.12        | 88.09        | 97.83        | 97.00        | 103.45       | 102.26       |
| IRR/INSRR   | 95.98        | 93.76        | 75.90        | 70.29        | 71.87        | 70.84        |
| ITK         | 106.70       | 99.31        | 92.77        | 92.29        | 94.41        | 91.41        |
| JAK1        | 98.67        | 94.40        | 107.40       | 103.94       | 72.22        | 71.47        |
| JAK2        | 98.19        | 95.41        | 96.46        | 88.12        | 95.04        | 94.99        |
| JAK3        | 102.01       | 100.23       | 98.66        | 96.18        | 96.73        | 95.21        |
| JNK1        | <b>57.60</b> | <b>55.85</b> | <b>49.13</b> | <b>47.91</b> | 76.30        | 74.25        |
| JNK2        | <b>34.12</b> | <b>33.90</b> | <b>22.70</b> | <b>21.84</b> | <b>51.87</b> | <b>50.09</b> |
| <b>JNK3</b> | <b>7.81</b>  | <b>6.08</b>  | <b>8.85</b>  | <b>8.76</b>  | <b>10.47</b> | <b>9.63</b>  |
| KDR/VEGFR2  | 95.19        | 94.57        | 88.29        | 87.45        | 88.22        | 87.45        |
| KHS/MAP4K5  | 99.13        | 94.61        | 102.78       | 102.05       | 98.39        | 96.58        |
| KSR1        | 100.82       | 100.22       | 104.82       | 100.19       | 102.95       | 102.74       |
| KSR2        | 106.91       | 104.96       | 92.66        | 91.89        | 99.22        | 94.21        |
| LATS1       | 105.98       | 105.37       | 93.53        | 92.23        | 97.22        | 96.57        |
| LATS2       | 95.97        | 92.68        | 103.57       | 101.69       | 94.69        | 94.42        |
| LCK         | 99.10        | 91.26        | 94.20        | 92.42        | 46.53        | 44.32        |
| LCK2/ICK    | 112.41       | 110.26       | 100.84       | 96.59        | 100.39       | 100.15       |
| LIMK1       | 96.16        | 96.01        | 104.47       | 98.61        | 104.69       | 104.17       |
| LIMK2       | 96.76        | 96.21        | 93.98        | 93.07        | 112.92       | 98.20        |

|                |        |        |        |        |        |        |
|----------------|--------|--------|--------|--------|--------|--------|
| LKB1           | 118.26 | 115.31 | 94.65  | 94.10  | 97.61  | 96.97  |
| LOK/STK10      | 87.86  | 87.02  | 88.98  | 87.45  | 96.39  | 95.76  |
| LRRK2          | 88.23  | 87.94  | 91.27  | 90.24  | 101.06 | 100.86 |
| LYN            | 96.75  | 94.36  | 95.30  | 93.32  | 105.59 | 103.36 |
| LYN B          | 94.68  | 93.09  | 87.31  | 82.84  | 88.78  | 86.83  |
| MAK            | 98.82  | 98.63  | 97.56  | 96.43  | 119.88 | 110.01 |
| MAPKAPK2       | 97.08  | 95.77  | 99.85  | 92.89  | 93.57  | 89.94  |
| MAPKAPK3       | 83.54  | 77.32  | 95.64  | 92.60  | 109.92 | 108.41 |
| MAPKAPK5/PRAK  | 92.82  | 91.04  | 99.73  | 96.33  | 96.47  | 95.33  |
| MARK1          | 96.35  | 93.65  | 108.08 | 107.68 | 95.34  | 95.19  |
| MARK2/PAR-1Ba  | 104.31 | 104.12 | 90.71  | 89.37  | 99.82  | 97.94  |
| MARK3          | 98.23  | 97.73  | 99.34  | 98.43  | 101.51 | 100.16 |
| MARK4          | 107.82 | 101.29 | 97.91  | 97.87  | 108.32 | 107.61 |
| MAST3          | nd     | nd     | 108.27 | 104.14 | 96.70  | 95.18  |
| MASTL          | 96.74  | 96.59  | 93.69  | 93.53  | 110.07 | 108.24 |
| MEK1           | 103.88 | 101.93 | 107.16 | 106.60 | 95.52  | 92.97  |
| MEK2           | 92.15  | 91.56  | 90.56  | 87.91  | 99.54  | 97.50  |
| MEK3           | 103.66 | 103.65 | 110.84 | 98.78  | 88.77  | 81.98  |
| MEK5           | 98.20  | 98.01  | 103.04 | 99.33  | 96.85  | 89.58  |
| MEKK1          | 103.43 | 103.38 | 98.70  | 98.46  | 94.54  | 91.66  |
| MEKK2          | 110.44 | 103.97 | 80.13  | 78.60  | 88.07  | 88.06  |
| MEKK3          | 112.66 | 105.89 | 81.92  | 80.44  | 113.33 | 108.54 |
| MEKK6          | 98.85  | 94.33  | 92.50  | 90.69  | 79.33  | 77.68  |
| MELK           | 48.70  | 48.18  | 61.40  | 59.61  | 102.99 | 100.16 |
| MINK/MINK1     | 79.36  | 78.64  | 62.22  | 57.78  | 102.17 | 101.98 |
| MKK4           | 113.08 | 111.42 | 133.47 | 128.10 | 93.03  | 93.02  |
| MKK6           | 96.44  | 95.10  | 94.41  | 84.96  | 86.38  | 85.38  |
| MKK7           | 112.18 | 109.33 | 135.29 | 134.99 | 119.77 | 115.05 |
| MLCK/MYLK      | 97.51  | 94.38  | 95.87  | 92.85  | 102.60 | 102.42 |
| MLCK2/MYLK2    | 89.90  | 89.22  | 83.54  | 79.44  | 78.65  | 78.49  |
| MLK1/MAP3K9    | 95.06  | 94.25  | 88.47  | 88.03  | 87.52  | 87.12  |
| MLK2/MAP3K10   | 98.47  | 98.09  | 94.31  | 92.29  | 90.80  | 88.47  |
| MLK3/MAP3K11   | 93.45  | 92.56  | 84.69  | 83.36  | 90.67  | 86.28  |
| MLK4           | 93.15  | 92.52  | 94.32  | 94.11  | 85.24  | 83.89  |
| MNK1           | 94.27  | 94.24  | 103.28 | 103.05 | 94.15  | 93.25  |
| MNK2           | 99.35  | 96.75  | 90.79  | 90.66  | 83.39  | 79.46  |
| MRCKa/CDC42BPA | 99.34  | 96.17  | 98.97  | 97.51  | 104.07 | 101.90 |
| MRCKb/CDC42BPB | 97.10  | 95.66  | 89.02  | 84.42  | 111.73 | 111.02 |
| MSK1/RPS6KA5   | 89.48  | 87.65  | 104.50 | 101.01 | 111.30 | 103.83 |
| MSK2/RPS6KA4   | 90.68  | 90.63  | 99.85  | 99.35  | 104.68 | 104.36 |
| MSSK1/STK23    | 91.94  | 90.93  | 89.79  | 85.70  | 98.87  | 92.65  |
| MST1/STK4      | 99.29  | 94.51  | 96.62  | 92.82  | 107.06 | 105.79 |
| MST2/STK3      | 119.51 | 116.20 | 93.18  | 93.01  | 93.94  | 92.76  |
| MST3/STK24     | 113.14 | 110.47 | 81.61  | 81.18  | 67.27  | 63.25  |
| MST4           | 98.26  | 94.12  | 71.40  | 69.65  | 72.41  | 71.35  |
| MUSK           | 94.45  | 91.22  | 86.81  | 86.23  | 103.41 | 102.42 |
| MYLK3          | 95.09  | 90.49  | 101.81 | 92.13  | 111.63 | 109.69 |
| MYLK4          | 85.24  | 83.36  | 91.73  | 90.80  | 108.71 | 108.51 |
| MYO3A          | 94.53  | 91.46  | 82.83  | 75.76  | 91.09  | 88.15  |
| MYO3b          | 128.21 | 125.72 | 100.86 | 95.64  | 78.67  | 73.50  |
| NEK1           | 115.21 | 111.73 | 77.17  | 68.70  | 90.41  | 89.34  |
| NEK11          | 144.68 | 136.40 | 89.55  | 88.71  | 70.00  | 63.48  |

|                        |        |        |        |        |        |        |
|------------------------|--------|--------|--------|--------|--------|--------|
| <b>NEK2</b>            | 104.16 | 102.20 | 96.24  | 93.32  | 88.02  | 84.41  |
| <b>NEK3</b>            | 102.58 | 98.96  | 87.25  | 82.26  | 87.45  | 86.55  |
| <b>NEK4</b>            | 108.95 | 106.86 | 90.82  | 89.09  | 75.55  | 75.28  |
| <b>NEK5</b>            | 110.33 | 107.26 | 88.09  | 87.92  | 105.32 | 102.25 |
| <b>NEK6</b>            | 102.77 | 99.56  | 87.15  | 86.75  | 93.27  | 92.66  |
| <b>NEK7</b>            | 101.79 | 101.22 | 88.11  | 87.60  | 100.04 | 95.94  |
| <b>NEK8</b>            | 107.28 | 106.90 | nd     | nd     | nd     | nd     |
| <b>NEK9</b>            | 104.35 | 104.34 | 88.36  | 85.75  | 111.28 | 110.53 |
| <b>NIM1</b>            | 101.39 | 101.29 | 70.72  | 69.78  | 107.17 | 107.12 |
| <b>NLK</b>             | 99.47  | 96.41  | 87.41  | 87.33  | 85.15  | 83.86  |
| <b>OSR1/OXSR1</b>      | 92.58  | 92.43  | 96.51  | 91.54  | 126.78 | 118.37 |
| <b>P38a/MAPK14</b>     | 141.98 | 140.87 | 104.85 | 103.81 | 93.16  | 85.97  |
| <b>P38b/MAPK11</b>     | 100.86 | 98.03  | 91.71  | 88.84  | 94.33  | 88.02  |
| <b>P38d/MAPK13</b>     | 122.26 | 119.83 | 98.42  | 91.95  | 89.20  | 85.65  |
| <b>P38g</b>            | 99.37  | 94.52  | 98.27  | 97.49  | 90.47  | 80.85  |
| <b>p70S6K/RPS6KB1</b>  | 92.11  | 91.11  | 97.74  | 97.56  | 92.12  | 91.12  |
| <b>p70S6Kb/RPS6KB2</b> | 94.17  | 94.02  | 101.38 | 99.90  | 98.93  | 97.40  |
| <b>PAK1</b>            | 106.01 | 103.66 | 81.20  | 76.08  | 103.67 | 98.15  |
| <b>PAK2</b>            | 90.11  | 86.23  | 95.31  | 92.21  | 105.80 | 103.94 |
| <b>PAK3</b>            | 97.39  | 96.80  | 64.23  | 62.40  | 113.75 | 108.53 |
| <b>PAK4</b>            | 98.87  | 92.17  | 106.73 | 104.75 | 106.39 | 103.46 |
| <b>PAK5</b>            | 92.12  | 90.70  | 92.86  | 92.78  | 103.47 | 103.05 |
| <b>PAK6</b>            | 130.58 | 127.00 | 92.92  | 88.33  | 99.92  | 99.07  |
| <b>PASK</b>            | 96.31  | 94.19  | 99.72  | 93.30  | 96.14  | 92.92  |
| <b>PBK/TOPK</b>        | 114.88 | 111.94 | 98.16  | 95.69  | 88.48  | 86.39  |
| <b>PDGFRa</b>          | 95.25  | 91.67  | 106.99 | 105.80 | 114.34 | 101.61 |
| <b>PDGFRb</b>          | 107.18 | 98.53  | 100.99 | 92.40  | 97.93  | 88.31  |
| <b>PDK1/PDPK1</b>      | 100.87 | 94.26  | 99.58  | 99.08  | 99.18  | 95.19  |
| <b>PEAK1</b>           | 91.36  | 90.97  | nd     | nd     | nd     | nd     |
| <b>PHKg1</b>           | 101.60 | 100.36 | 91.24  | 90.46  | 83.95  | 83.21  |
| <b>PHKg2</b>           | 100.57 | 98.24  | 131.01 | 127.31 | 88.50  | 80.45  |
| <b>PIM1</b>            | 64.61  | 64.36  | 73.33  | 72.49  | 95.09  | 93.11  |
| <b>PIM2</b>            | 96.37  | 96.02  | 128.59 | 126.93 | 96.51  | 95.53  |
| <b>PIM3</b>            | 61.24  | 60.47  | 73.91  | 73.07  | 128.82 | 126.62 |
| <b>PKA</b>             | 99.81  | 96.77  | 107.72 | 102.18 | 94.54  | 92.47  |
| <b>PKAcb</b>           | 98.97  | 97.74  | 98.29  | 86.39  | 104.28 | 104.11 |
| <b>PKAcbg</b>          | 104.45 | 101.81 | 97.57  | 97.05  | 99.03  | 97.39  |
| <b>PKCa</b>            | 101.32 | 100.41 | 90.65  | 90.27  | 95.91  | 92.54  |
| <b>PKCb1</b>           | 101.55 | 100.64 | 100.22 | 98.69  | 110.62 | 104.62 |
| <b>PKCb2</b>           | 102.73 | 102.48 | 98.95  | 98.60  | 98.35  | 96.76  |
| <b>PKCd</b>            | 112.31 | 107.07 | 101.26 | 100.19 | 98.01  | 95.12  |
| <b>PKCepsilon</b>      | 101.98 | 98.35  | 94.25  | 92.54  | 101.17 | 99.42  |
| <b>PKCeta</b>          | 102.59 | 100.01 | 99.05  | 97.40  | 91.56  | 84.37  |
| <b>PKCg</b>            | 97.98  | 97.24  | 98.35  | 95.74  | 101.69 | 100.79 |
| <b>PKCiota</b>         | 95.54  | 94.16  | 87.37  | 81.40  | 90.83  | 90.48  |
| <b>PKCmu/PRKD1</b>     | 113.86 | 105.64 | 90.68  | 88.67  | 93.35  | 93.19  |
| <b>PKCnu/PRKD3</b>     | 104.21 | 100.90 | 104.98 | 102.96 | 104.52 | 102.17 |
| <b>PKCtheta</b>        | 113.89 | 100.22 | 94.74  | 92.16  | 96.88  | 96.03  |
| <b>PKCzeta</b>         | 105.39 | 101.79 | 93.62  | 92.76  | 103.63 | 103.55 |
| <b>PKD2/PRKD2</b>      | 94.93  | 92.84  | 102.17 | 98.13  | 95.68  | 95.36  |
| <b>PKG1a</b>           | 110.14 | 107.44 | 93.23  | 93.09  | 120.40 | 109.05 |
| <b>PKG1b</b>           | 87.55  | 86.19  | 99.99  | 98.34  | 87.31  | 84.74  |

|                     |        |        |        |        |        |        |
|---------------------|--------|--------|--------|--------|--------|--------|
| <b>PKG2/PRKG2</b>   | 100.92 | 97.41  | 100.85 | 99.42  | 100.48 | 96.50  |
| <b>PKMYT1</b>       | 86.96  | 86.80  | 89.61  | 89.25  | nd     | nd     |
| <b>PKN1/PRK1</b>    | 109.51 | 108.34 | 96.50  | 94.16  | 76.85  | 73.93  |
| <b>PKN2/PRK2</b>    | 111.95 | 109.14 | 105.38 | 104.85 | 87.07  | 86.46  |
| <b>PKN3/PRK3</b>    | 92.46  | 91.58  | 76.19  | 74.34  | 98.61  | 97.90  |
| <b>PLK1</b>         | 97.01  | 94.28  | 95.55  | 92.77  | 103.87 | 102.40 |
| <b>PLK2</b>         | 86.05  | 85.33  | 100.13 | 99.51  | 95.21  | 93.24  |
| <b>PLK3</b>         | 96.08  | 93.64  | 96.04  | 95.88  | 101.94 | 100.40 |
| <b>PLK4/SAK</b>     | 88.18  | 87.95  | 84.29  | 83.82  | 100.36 | 99.38  |
| <b>PRKX</b>         | 103.95 | 102.07 | 91.49  | 88.11  | 87.49  | 79.11  |
| <b>PYK2</b>         | 93.53  | 92.71  | 91.04  | 89.71  | 103.87 | 101.80 |
| <b>RAF1</b>         | 86.96  | 82.02  | 92.48  | 88.10  | 92.60  | 85.53  |
| <b>RET</b>          | 97.80  | 95.48  | 98.13  | 98.08  | 113.39 | 110.76 |
| <b>RIPK2</b>        | 120.34 | 113.72 | 80.24  | 75.68  | 89.29  | 87.55  |
| <b>RIPK3</b>        | 100.98 | 98.09  | 97.55  | 92.71  | nd     | nd     |
| <b>RIPK4</b>        | 89.19  | 77.00  | 96.69  | 92.28  | 102.82 | 98.45  |
| <b>RIPK5</b>        | 102.02 | 101.13 | 95.51  | 94.86  | 96.59  | 95.70  |
| <b>ROCK1</b>        | 108.96 | 108.68 | 78.18  | 75.70  | 96.81  | 96.41  |
| <b>ROCK2</b>        | 100.38 | 99.37  | 107.03 | 102.48 | 93.57  | 91.72  |
| <b>RON/MST1R</b>    | 108.15 | 94.20  | 99.98  | 96.90  | 96.89  | 88.05  |
| <b>ROS/ROS1</b>     | 102.99 | 101.59 | 85.55  | 85.00  | 102.30 | 102.23 |
| <b>RSK1</b>         | 92.36  | 91.37  | 96.32  | 95.98  | 93.18  | 90.97  |
| <b>RSK2</b>         | 100.61 | 95.11  | 79.87  | 78.52  | 73.04  | 71.41  |
| <b>RSK3</b>         | 102.78 | 102.31 | 90.06  | 89.38  | 100.27 | 94.06  |
| <b>RSK4</b>         | 107.17 | 102.38 | 92.19  | 91.27  | 115.69 | 115.36 |
| <b>SBK1</b>         | 99.08  | 98.84  | 97.70  | 95.71  | 87.45  | 80.58  |
| <b>SGK1</b>         | 93.72  | 92.96  | 95.38  | 91.71  | 115.37 | 114.27 |
| <b>SGK2</b>         | 101.25 | 100.07 | 88.57  | 88.54  | 97.24  | 94.05  |
| <b>SGK3/SGKL</b>    | 93.77  | 86.54  | 95.34  | 86.29  | 90.11  | 89.10  |
| <b>SIK1</b>         | 102.09 | 100.71 | 98.34  | 96.55  | 99.79  | 95.43  |
| <b>SIK2</b>         | 97.01  | 96.84  | 95.77  | 95.38  | 89.82  | 88.74  |
| <b>SIK3</b>         | 92.41  | 91.64  | 94.50  | 93.35  | 86.93  | 81.60  |
| <b>SLK/STK2</b>     | 89.71  | 87.93  | 94.99  | 94.62  | 99.70  | 99.11  |
| <b>SNARK/NUAK2</b>  | 99.78  | 97.60  | 97.80  | 95.90  | 111.83 | 111.42 |
| <b>SNRK</b>         | 96.83  | 90.60  | 98.76  | 94.52  | 102.32 | 100.60 |
| <b>SRMS</b>         | 99.78  | 99.25  | 104.82 | 102.21 | 103.66 | 102.62 |
| <b>SRPK1</b>        | 98.71  | 94.40  | 103.79 | 99.01  | 96.92  | 96.82  |
| <b>SRPK2</b>        | 95.64  | 94.96  | 94.00  | 93.75  | 113.80 | 111.56 |
| <b>SSTK/TSSK6</b>   | 103.45 | 102.43 | 102.90 | 92.58  | 94.01  | 87.61  |
| <b>STK16</b>        | 98.61  | 94.14  | 106.54 | 100.13 | 94.36  | 94.26  |
| <b>STK21/CIT</b>    | 90.14  | 87.64  | nd     | nd     | 98.81  | 97.63  |
| <b>STK22D/TSSK1</b> | 101.70 | 97.48  | 106.56 | 101.81 | 102.88 | 102.11 |
| <b>STK25/YSK1</b>   | 106.06 | 105.80 | 96.11  | 94.22  | 70.55  | 69.19  |
| <b>STK32B/YANK2</b> | 122.29 | 122.14 | 102.97 | 101.16 | 89.81  | 81.71  |
| <b>STK32C/YANK3</b> | 113.00 | 105.00 | 90.70  | 85.47  | 112.12 | 111.17 |
| <b>STK33</b>        | 99.34  | 95.39  | 81.81  | 80.29  | 87.62  | 87.51  |
| <b>STK38/NDR1</b>   | 99.16  | 98.55  | 95.53  | 95.29  | 91.50  | 88.33  |
| <b>STK38L/NDR2</b>  | 102.63 | 100.37 | 94.75  | 93.00  | 95.14  | 93.75  |
| <b>STK39/STLK3</b>  | 87.51  | 83.27  | 82.30  | 74.78  | 64.55  | 62.58  |
| <b>SYK</b>          | 103.79 | 100.71 | 90.34  | 86.91  | 88.53  | 85.46  |
| <b>TAK1</b>         | 98.00  | 97.75  | 109.47 | 109.41 | 98.42  | 97.70  |
| <b>TAOK1</b>        | 122.31 | 121.33 | 90.64  | 89.61  | 109.94 | 108.33 |

|              |        |        |        |        |        |        |
|--------------|--------|--------|--------|--------|--------|--------|
| TAOK2/TAO1   | 101.21 | 101.17 | 88.17  | 84.66  | 93.26  | 88.63  |
| TAOK3/JIK    | 103.32 | 102.95 | 90.15  | 88.00  | 97.96  | 94.36  |
| TBK1         | 102.03 | 99.45  | 98.79  | 98.48  | 97.79  | 95.84  |
| TEC          | 97.16  | 95.04  | 97.65  | 97.28  | 91.08  | 90.91  |
| TESK1        | 100.67 | 100.49 | 91.00  | 84.69  | 88.70  | 87.96  |
| TESK2        | 93.34  | 91.78  | 80.12  | 78.64  | 99.22  | 97.37  |
| TGFBR2       | 113.33 | 104.08 | 82.58  | 82.14  | 86.85  | 86.82  |
| TIE2/TEK     | 100.42 | 97.21  | 105.44 | 104.23 | 86.64  | 85.92  |
| TLK1         | 104.55 | 102.03 | 53.36  | 48.17  | 105.12 | 102.81 |
| TLK2         | 99.08  | 98.73  | 109.31 | 106.34 | 97.16  | 94.14  |
| TNIK         | 53.25  | 51.88  | 84.33  | 83.10  | 94.47  | 93.91  |
| TNK1         | 100.42 | 98.27  | 91.54  | 90.74  | 105.21 | 102.24 |
| TRKA         | 99.96  | 95.41  | 87.82  | 87.48  | 80.99  | 76.75  |
| TRKB         | 84.15  | 83.82  | 91.45  | 88.25  | 92.37  | 82.95  |
| TRKC         | 64.31  | 64.04  | 38.61  | 36.52  | 85.97  | 85.08  |
| TSSK2        | 91.55  | 90.03  | 95.14  | 95.11  | 84.68  | 84.23  |
| TSSK3/STK22C | 97.71  | 97.63  | 101.08 | 96.70  | 100.00 | 99.06  |
| TTBK1        | 97.25  | 92.57  | 82.32  | 80.80  | 113.33 | 101.61 |
| TTBK2        | 106.96 | 105.69 | 103.68 | 102.18 | 97.61  | 92.08  |
| TXK          | 89.75  | 87.45  | 90.81  | 90.15  | 76.68  | 73.77  |
| TYK1/LTK     | 99.18  | 94.47  | 92.19  | 91.35  | 114.12 | 109.99 |
| TYK2         | 95.87  | 91.08  | 89.26  | 88.73  | 114.21 | 109.10 |
| TYRO3/SKY    | 75.40  | 75.37  | 68.40  | 65.60  | 98.80  | 96.81  |
| ULK1         | 133.53 | 131.26 | 93.93  | 91.13  | 77.26  | 70.77  |
| ULK2         | 196.10 | 194.58 | 105.22 | 90.15  | 74.92  | 69.83  |
| ULK3         | 111.12 | 103.36 | 76.58  | 74.98  | 105.03 | 99.50  |
| VRK1         | 109.03 | 98.12  | 91.87  | 91.08  | 108.94 | 104.53 |
| VRK2         | 103.33 | 102.70 | 102.23 | 101.89 | 101.73 | 100.17 |
| WEE1         | 124.04 | 121.51 | 85.22  | 72.39  | 97.27  | 91.19  |
| WNK1         | 99.70  | 97.40  | 93.27  | 92.88  | 88.89  | 87.30  |
| WNK2         | 96.35  | 95.59  | 91.94  | 88.67  | 91.10  | 90.51  |
| WNK3         | 99.55  | 96.88  | 91.80  | 87.30  | 102.15 | 100.53 |
| YES/YES1     | 96.53  | 91.46  | 91.00  | 90.52  | 81.42  | 81.19  |
| YSK4/MAP3K19 | 105.00 | 104.03 | 126.35 | 97.32  | 95.47  | 92.17  |
| ZAK/MLTK     | 100.61 | 98.53  | 90.44  | 88.52  | 89.88  | 85.41  |
| ZAP70        | 101.56 | 98.40  | 103.97 | 103.52 | 103.24 | 98.81  |
| ZIPK/DAPK3   | 100.30 | 95.77  | 107.76 | 100.23 | 100.51 | 99.46  |

**3.1 Crystallization:** Purification of JNK3 39-402 and its crystallization with ATP was done following previously published procedure.<sup>2-5</sup> The JNK3 inhibitor was soaked into JNK3-ATP crystals by adding 1 mM of the compound into the crystallization drop and incubating for 24 hrs. The crystals were then transferred to mounting loops and excess drop solutions were removed and flash frozen by plunging into liquid nitrogen.

**3.2 Data collection and refinement:** Diffraction datasets were collected on Rayonix MX300 at the APS beamline 21-ID-F. The datasets were processed with HKL2000 (HKL Research, Inc) and were phased using Phaser (Phenix suite)<sup>6</sup> with PDB ID 1JNK as the search model for molecular replacements. Initial phased map showed positive density for the target compounds in the ATP pocket. Restraints and coordinates for the compounds were generated using eLBOW

(Phenix suite)<sup>6</sup> and incorporated into JNK3 coordinate. The models were refined using BUSTER (Global Phasing Ltd.) or phenix.refine (Phenix suite)<sup>6</sup>. The models were manually inspected and adjusted after each refinement cycle using Coot<sup>7</sup>. Data processing and refinement statistics are given in Table S1. Structural analysis and figure preparations were done with PyMol (Schrodinger, Inc.). The final coordinates were deposited with PDB IDs 7KSK, 7KSJ and 7KSI.

**3.3 The Co-crystal structure of compound 17 in human JNK3:** Transparent sphere and wire model of residues involved in hydrophobic pocket formation. The residues, I70 and A151 sandwich the thiophene ring. V78, A91 (not visible), and V196 VdW contact with pyrazole ring. The residues K93, I124, L126 and L144 wraps around Cl-phenyl ring. **17** is colored blue and the protein residues are colored grey.

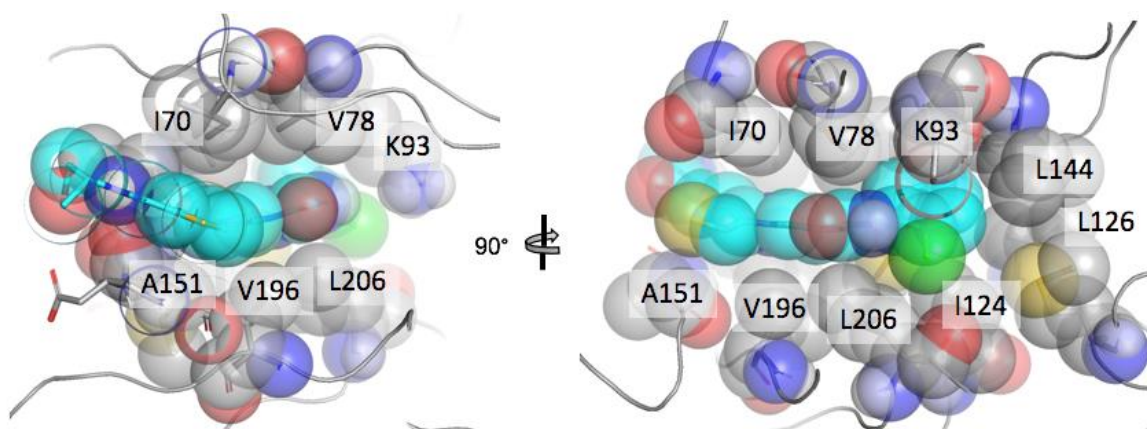

**3.4 The Co-crystal structures of compound 17 (cyan) and 25 (orange) in human JNK3:** The stick models of residues involved in H-bond/Halogen bond interactions. The hinge residue M149 make two H-bonds. K93 and D150 are involved in water-mediated H-bonds. Appearance of the water mediated H-bonds in both structures indicate they are stable H-bonds. K93 also makes halogen bond with Cl of Cl-phenyl.

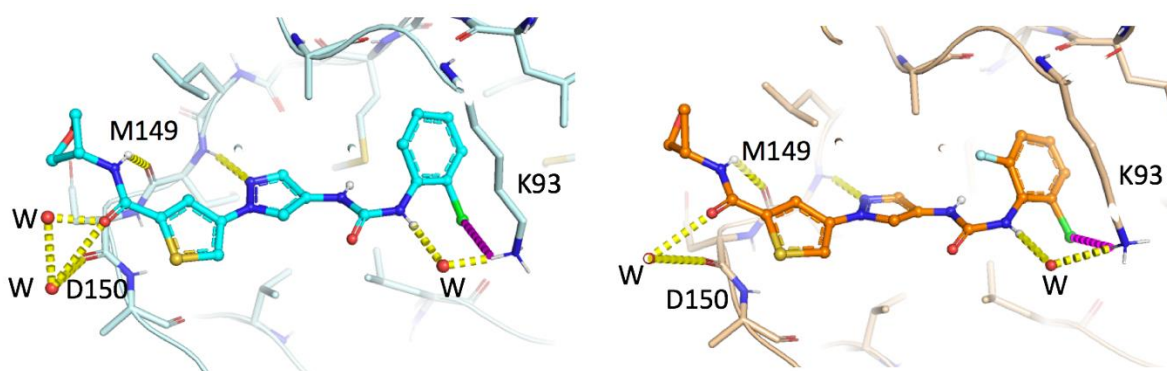

Table S1. Data processing and refinement statistics

| Protein                                                                               | JNK3:17 (7KSK)                                              | JNK3:25 (7KSJ)                                              | JNK3:27 (7KSI)                                              |
|---------------------------------------------------------------------------------------|-------------------------------------------------------------|-------------------------------------------------------------|-------------------------------------------------------------|
| Space group                                                                           | P 21 21 21                                                  | P 21 21 21                                                  | P 21 21 21                                                  |
| Cell constants a, b, c, $\alpha$ , $\beta$ , $\gamma$                                 | 52.14Å, 71.22Å, 107.60Å,<br>90.00°, 90.00°, 90.00°          | 51.45Å, 71.24Å, 107.80Å,<br>90.00°, 90.00°, 90.00°          | 52.13Å, 71.09Å, 107.40Å,<br>90.00°, 90.00°, 90.00°          |
| Resolution (Å)                                                                        | 53.80 – 1.84                                                | 41.71 – 2.06                                                | 53.70 – 1.73                                                |
| % Data completeness (in resolution range)                                             | 86.9 (53.80-1.84)                                           | 77.6 (41.71-2.06)                                           | 62.1 (53.70-1.73)                                           |
| R <sub>merge</sub> (in resolution range)                                              | 0.042 (53.80-1.84)                                          | 0.063 (41.71-2.06)                                          | 0.051(53.70-1.73)                                           |
| Total unique reflections (in resolution range)                                        | 31286 (53.80-1.84)                                          | 23626 (41.71-2.06)                                          | 28032 (53.70-1.73)                                          |
| $\langle I/\sigma(I) \rangle^1$                                                       | 2.65 (at 1.83Å)                                             | 3.42 (at 2.06Å)                                             | 1.52 (at 1.73Å)                                             |
| Refinement program                                                                    | PHENIX dev_3965                                             | BUSTER 2.10.3                                               | BUSTER 2.10.3                                               |
| R, R <sub>free</sub>                                                                  | 0.247, 0.290                                                | 0.230, 0.292                                                | 0.220, 0.255                                                |
| R <sub>free</sub> test set                                                            | 1557 reflections (5.00%)                                    | 978 reflections (5.00%)                                     | 1328 reflections (5.01%)                                    |
| Wilson B-factor (Å <sup>2</sup> )                                                     | 27.2                                                        | 21.6                                                        | 23.3                                                        |
| Anisotropy                                                                            | 0.832                                                       | 1.003                                                       | 0.084                                                       |
| Bulk solvent k <sub>sol</sub> (e/Å <sup>3</sup> ), B <sub>sol</sub> (Å <sup>2</sup> ) | 0.34, 37.5                                                  | 0.27, 47.3                                                  | 0.35, 39.0                                                  |
| L-test for twinning <sup>2</sup>                                                      | $\langle  L  \rangle = 0.49$ , $\langle L^2 \rangle = 0.32$ | $\langle  L  \rangle = 0.44$ , $\langle L^2 \rangle = 0.27$ | $\langle  L  \rangle = 0.48$ , $\langle L^2 \rangle = 0.31$ |
| Estimated twinning fraction                                                           | No twinning to report.                                      | No twinning to report.                                      | No twinning to report.                                      |
| F <sub>o</sub> , F <sub>c</sub> correlation                                           | 0.94                                                        | 0.89                                                        | 0.93                                                        |
| Total number of atoms                                                                 | 5657                                                        | 3018                                                        | 5959                                                        |
| Average B, all atoms (Å <sup>2</sup> )                                                | 50.0                                                        | 45.0                                                        | 33.0                                                        |

<sup>1</sup>Intensities estimated from amplitudes.

<sup>2</sup>Theoretical values of  $\langle |L| \rangle$ ,  $\langle L^2 \rangle$  for acentric reflections are 0.5, 0.333 respectively for untwinned datasets, and 0.375, 0.2 for perfectly twinned datasets

## 4. Pharmacology experiment

### 4.1 Pharmacokinetics

Pharmacokinetics studies were conducted in C57Bl/6J mice. The compound was formulated in a generic formulation at 1 mg/mL (e.g. 10:40:4:46, DMSO:PEG 400: tween 80: PBS, v:v:v:v) or other specified formulations and dosed at 1 mg/kg intravenous into the femoral vein or 1-10 mg/kg by oral gavage, or 5-20 mg ip. Blood was obtained at t=5 min, 15 min, 30 min, 1hr, 2hr, 4hr, 6hr, and 8hr. Blood was collected by heart puncture into EDTA containing tubes and plasma was generated by standard centrifugation methods. Brains were collected following perfusion with ice-cold saline, and snap frozen in liquid N<sub>2</sub>. Both plasma and brains were stored at -80°C until processing. All procedures and handling were according to standard operating procedures approved by IAPUC at Scripps Florida and/or Ohio State University. In order to assess in vivo pharmacokinetic parameters an LC-MS/MS bioanalytical method was developed where 25 Tl of plasma was treated with 125 Tl of acetonitrile containing an internal standard in a Millipore Multiscreen Slovinter 0.45 micron low binding PTFE hydrophilic filter plate (#MSRLN0450) and allowed to shake at room temperature for five minute. The plate was then centrifuged for 5 minutes at 4000 rpm in a tabletop centrifuge and the filtrate was collected in a polypropylene capture plate. The filtrate (10 Tl) is injected using an Agilent 1200 HPLC equipped with a Thermo Betasil C18 HPLC column 5 T (50×2.1 mm) #70105-052130. Mobile Phase A was water with 0.1% formic acid. Mobile phase B was acetonitrile with 0.1% formic acid. Flow rate was 375 Tl/min using a gradient of 90%A/10% B from, 0-0.5 min, ramped to 5%A/95%B at 2 min, held at 5%A/95%B until 3.0 min, ramped to 90% A/10% B at 4 min, and held at 90%A/10%B until

7 min. An API Sciex 4000 equipped with a turbo ion spray source was used for all analytical measurement. MRM methods were developed in position ion mode. Peak areas of the analyte ion were measured against the peak areas of the internal standard. Data was fit using WinNonLin using an IV bolus model.<sup>8-13</sup>

## 4.2 P450s inhibition

P450s inhibition for four major isoforms are evaluated using a cocktail inhibition assay where the metabolism of specific marker substrate (CYP1A2 phenacetin demethylation to acetaminophen); CYP2C9, tolbutamide hydroxylation to hydroxytolbutamide; CYP2D6, bufuralol hydroxylation to 4'-Hydroxybufuralol; and CYP3A4, midazolam hydroxylation to 1'-Hydroxymidazolam) in the presence or absence of 10 TM probe compound is evaluated. The concentration of each marker substrate is approximately its  $K_m$ . Conditions were similar to those described by Tesino and Patonay<sup>14</sup> except 2C19 was not evaluated as we found that stock solution of the 2C19 probe substrate, omeprazole, had poor stability. Specific inhibitors for each isoform are included in each run to validate the system.

## References:

1. Yoon, S. O.; Park, D. J.; Ryu, J. C.; Ozer, H. G.; Tep, C.; Shin, Y. J.; Lim, T. H.; Pastorino, L.; Kunwar, A. J.; Walton, J. C.; Nagahara, A. H.; Lu, K. P.; Nelson, R. J.; Tuszyński, M. H.; Huang, K. JNK3 perpetuates metabolic stress induced by Abeta peptides. *Neuron* **2012**, *75*, 824-37.
2. Kamenecka, T.; Habel, J.; Duckett, D.; Chen, W. M.; Ling, Y. Y.; Frackowiak, B.; Jiang, R.; Shin, Y. S.; Song, X. Y.; LoGrasso, P. Structure-Activity Relationships and X-ray Structures Describing the Selectivity of Aminopyrazole Inhibitors for c-Jun N-terminal Kinase 3 (JNK3) over p38. *J. Biol. Chem.* **2009**, *284*, 12853-12861.
3. Kamenecka, T.; Jiang, R.; Song, X. Y.; Duckett, D.; Chen, W. M.; Ling, Y. Y.; Habel, J.; Laughlin, J. D.; Chambers, J.; Figuera-Losada, M.; Cameron, M. D.; Lin, L.; Ruiz, C. H.; LoGrasso, P. V. Synthesis, Biological Evaluation, X-ray Structure, and Pharmacokinetics of Aminopyrimidine c-jun-N-terminal Kinase (JNK) Inhibitors. *Journal of Medicinal Chemistry* **2010**, *53*, 419-431.
4. Chambers, J. W.; Howard, S.; LoGrasso, P. V. Blocking c-Jun N-terminal kinase (JNK) translocation to the mitochondria prevents 6-hydroxydopamine-induced toxicity in vitro and in vivo. *J. Biol. Chem.* **2013**, *288*, 1079-1088.
5. Chambers, J. W.; Pachori, A.; Howard, S.; Iqbal, S.; LoGrasso, P. V. Inhibition of JNK mitochondrial localization and signaling is protective against ischemia/reperfusion injury in rats. *J. Biol. Chem.* **2013**, *288*, 4000-11.
6. Adams, P. D.; Afonine, P. V.; Bunkoczi, G.; Chen, V. B.; Davis, I. W.; Echols, N.; Headd, J. J.; Hung, L. W.; Kapral, G. J.; Grosse-Kunstleve, R. W.; McCoy, A. J.; Moriarty, N. W.; Oeffner, R.; Read, R. J.; Richardson, D. C.; Richardson, J. S.; Terwilliger, T. C.; Zwart, P. H. PHENIX: a comprehensive Python-based system for macromolecular structure solution. *Acta Crystallogr D Biol Crystallogr* **2010**, *66*, 213-21.
7. Emsley, P.; Cowtan, K. Coot: model-building tools for molecular graphics. *Acta Crystallogr D Biol Crystallogr* **2004**, *60*, 2126-32.
8. Feng, Y.; Yin, Y.; Weiser, A.; Griffin, E.; Cameron, M. D.; Lin, L.; Ruiz, C.; Schurer, S. C.; Inoue, T.; Rao, P. V.; Schroter, T.; Lograsso, P. Discovery of substituted 4-(pyrazol-4-yl)-phenylbenzodioxane-2-carboxamides as potent and highly selective Rho kinase (ROCK-II) inhibitors. *J Med Chem* **2008**, *51*, 6642-5.
9. Sessions, E. H.; Yin, Y.; Bannister, T. D.; Weiser, A.; Griffin, E.; Pocas, J.; Cameron, M. D.; Ruiz, C.; Lin, L.; Schurer, S. C.; Schroter, T.; LoGrasso, P.; Feng, Y. Benzimidazole- and benzoxazole-based inhibitors of Rho kinase. *Bioorg. Med. Chem. Lett.* **2008**, *18*, 6390-6393.



10. Chowdhury, S.; Sessions, E. H.; Pocas, J. R.; Grant, W.; Schroter, T.; Lin, L.; Ruiz, C.; Cameron, M. D.; Schurer, S.; LoGrasso, P.; Bannister, T. D.; Feng, Y. Discovery and optimization of indoles and 7-azaindoles as Rho kinase (ROCK) inhibitors (part-I). *Bioorg. Med. Chem. Lett.* **2011**, 21, 7107-7112.
11. Fang, X.; Chen, Y. T.; Sessions, E. H.; Chowdhury, S.; Vojtkovsky, T.; Yin, Y.; Pocas, J. R.; Grant, W.; Schroter, T.; Lin, L.; Ruiz, C.; Cameron, M. D.; LoGrasso, P.; Bannister, T. D.; Feng, Y. Synthesis and biological evaluation of 4-quinazolinones as Rho kinase inhibitors. *Bioorg. Med. Chem. Lett.* **2011**, 21, 1844-1848.
12. Sessions, E. H.; Chowdhury, S.; Yin, Y.; Pocas, J. R.; Grant, W.; Schroter, T.; Lin, L.; Ruiz, C.; Cameron, M. D.; LoGrasso, P.; Bannister, T. D.; Feng, Y. Discovery and optimization of indole and 7-azaindoles as Rho kinase (ROCK) inhibitors (part-II). *Bioorg. Med. Chem. Lett.* **2011**, 21, 7113-7118.
13. Yin, Y.; Lin, L.; Ruiz, C.; Khan, S.; Cameron, M. D.; Grant, W.; Pocas, J.; Eid, N.; Park, H.; Schroter, T.; Lograsso, P. V.; Feng, Y. Synthesis and biological evaluation of urea derivatives as highly potent and selective rho kinase inhibitors. *J. Med. Chem.* **2013**, 56, 3568-3581.
14. Testino, S. A., Jr.; Patonay, G. High-throughput inhibition screening of major human cytochrome P450 enzymes using an in vitro cocktail and liquid chromatography-tandem mass spectrometry. *J Pharm Biomed Anal* **2003**, 30, 1459-67.
